# Supplementary material
Source: PubMed Central journal article supplement (PMC10291581)
Supplement: NIHPP2023.04.06.535891V2-supplement-1.pdf [file NIHPP2023.04.06.535891V2-supplement-1.pdf]

920 TABLES

| Table S1: ISN postsynaptic partners |                            |                    |                                     |                                     |                                     |                                     |                            |                              |                                                                                                                        |
|-------------------------------------|----------------------------|--------------------|-------------------------------------|-------------------------------------|-------------------------------------|-------------------------------------|----------------------------|------------------------------|------------------------------------------------------------------------------------------------------------------------|
|                                     | Cell type / Classification | Flywire ID         | Synapses from ISN 72057594 06197313 | Synapses from ISN 72057594 06283638 | Synapses from ISN 72057594 06256279 | Synapses from ISN 72057594 06241535 | Total synapses from 4 ISNs | Total synapses per cell type | Tracing contributions (number of edits)                                                                                |
| 1                                   | FLAa2                      | 720575940627559623 | 19                                  | 20                                  | 29                                  | 25                                  | 93                         |                              | Jefferis Lab: Irene Salgarella (3), Varun Sane (1).                                                                    |
| 2                                   | FLAa2                      | 720575940613754833 | 19                                  | 32                                  | 21                                  | 19                                  | 91                         |                              | Murthy and Seung Labs: James Hebditch (1), Ben Silverman (1), remer tancontian (1). Jefferis Lab: Bhargavi Parmar (4). |

|    |       |                    |    |    |    |    |    |  |                                                                                                                                                                                            |
|----|-------|--------------------|----|----|----|----|----|--|--------------------------------------------------------------------------------------------------------------------------------------------------------------------------------------------|
| 3  | FLAa2 | 720575940621782057 | 18 | 14 | 21 | 7  | 60 |  | Murthy and Seung Labs: Nash Hadjerol (6).                                                                                                                                                  |
| 4  | FLAa2 | 720575940623605180 | 10 | 10 | 14 | 14 | 48 |  | Dickson Lab: Alisa Poh (1). Murthy and Seung Labs: Austin T Burke (16), Shirleyjoy Serona (1).                                                                                             |
| 5  | FLAa2 | 720575940625218590 | 7  | 16 | 11 | 10 | 44 |  | Jefferis Lab: Irene Salgarella (8), Arti Yadav (1).                                                                                                                                        |
| 6  | FLAa2 | 720575940620994292 | 7  |    | 23 | 14 | 44 |  | Jefferis Lab: Irene Salgarella (1), Greg Jefferis (1), Philipp Schlegel (1), Bhargavi Parmar (1). Murthy and Seung Labs: Ben Silverman (1), Kendrick Joules Vinson (15), Joshua Bañez (2). |
| 7  | FLAa2 | 720575940632134483 | 17 | 6  | 13 | 6  | 42 |  | Jefferis Lab: Imaan Tamimi (1), Arti Yadav (1). Murthy and Seung Labs: James Hebditch (2), Nash Hadjerol (1).                                                                              |
| 8  | FLAa2 | 720575940619283553 | 11 | 10 | 9  | 12 | 42 |  | Jefferis Lab: Arti Yadav (1). Murthy and Seung Labs: Austin T Burke (14).                                                                                                                  |
| 9  | FLAa2 | 720575940620306300 | 21 |    | 5  | 12 | 38 |  | Murthy and Seung Labs: Austin T Burke (1), James Hebditch (2). Jefferis Lab: Arti Yadav (1).                                                                                               |
| 10 | FLAa2 | 720575940611991830 | 15 | 11 | 5  |    | 31 |  | Jefferis Lab: Irene Salgarella (2). Murthy and Seung Labs: Austin T Burke (11).                                                                                                            |
| 11 | FLAa2 | 720575940626512881 | 7  |    | 14 | 10 | 31 |  | Murthy and Seung Labs: Mendell Lopez (10).                                                                                                                                                 |
| 12 | FLAa2 | 720575940621680264 | 8  |    | 10 | 16 | 34 |  | Jefferis Lab: Anjali Pandey (1). Murthy and Seung Labs: Austin T Burke (12), J. Anthony Ocho (3).                                                                                          |
| 13 | FLAa2 | 720575940637381466 | 11 | 5  |    | 12 | 28 |  | Jefferis Lab: Irene Salgarella (4). Murthy and Seung Labs: Zairene Lenizo (1).                                                                                                             |
| 14 | FLAa2 | 720575940632695904 | 6  | 11 | 10 |    | 27 |  | Jefferis Lab: Irene Salgarella (4), Rashmita Rana (1).                                                                                                                                     |
| 15 | FLAa2 | 720575940631570636 |    | 6  | 14 | 6  | 26 |  | Murthy and Seung Labs: Austin T Burke (5), Shirleyjoy Serona (3), Mendell Lopez (45).                                                                                                      |
| 16 | FLAa2 | 720575940621605964 | 6  |    | 12 | 8  | 26 |  | Seung Lab: Zhihao Zheng (1). Jefferis Lab: Irene Salgarella (9), Márcia Santos (2).                                                                                                        |
| 17 | FLAa2 | 720575940637151807 | 8  | 5  | 13 |    | 26 |  | Seung Lab: Zhihao Zheng (4). Jefferis Lab: A. Javier (2), Dickson Lab: Alisa Poh (3). Murthy and Seung Labs: James Hebditch (2), regine salem (1).                                         |
| 18 | FLAa2 | 720575940622161032 | 15 | 9  |    |    | 24 |  | Jefferis Lab: Irene Salgarella (4). Murthy and Seung Labs: Nash Hadjerol (8), Joshua Bañez (14).                                                                                           |
| 19 | FLAa2 | 720575940612087922 | 6  |    | 12 | 6  | 24 |  | Jefferis Lab: Irene Salgarella (5). Murthy and Seung Labs: Austin T Burke (2), Nash Hadjerol (5).                                                                                          |
| 20 | FLAa2 | 720575940623752741 | 12 | 5  | 5  |    | 22 |  | Jefferis Lab: Irene Salgarella (5).                                                                                                                                                        |
| 21 | FLAa2 | 720575940643191575 |    | 6  | 15 |    | 21 |  | Murthy and Seung Labs: Mendell Lopez (11). Jefferis Lab: Arti Yadav (1).                                                                                                                   |
| 22 | FLAa2 | 720575940635191438 |    | 12 |    | 8  | 20 |  | Jefferis Lab: Irene Salgarella (3). Murthy and Seung Labs: Zairene Lenizo (2).                                                                                                             |
| 23 | FLAa2 | 720575940610624206 | 8  |    | 12 |    | 20 |  | Jefferis Lab: Irene Salgarella (4). Murthy and Seung Labs: remer tancontian (2), J. Dolorosa (1).                                                                                          |
| 24 | FLAa2 | 720575940644751651 | 6  | 6  | 6  |    | 18 |  | Jefferis Lab: Arti Yadav (1). Murthy and Seung Labs: Doug Bland (19).                                                                                                                      |
| 25 | FLAa2 | 720575940623989245 |    | 7  |    | 7  | 14 |  | Jefferis Lab: Irene Salgarella (5). Murthy and Seung Labs: remer tancontian(1), Austin T Burke (1), Ben Silverman (2).                                                                     |
| 26 | FLAa2 | 720575940623231527 |    |    | 9  | 5  | 14 |  | Jefferis Lab: Yijie Yin (3). Dickson Lab: Alisa Poh (1). Murthy and Seung Labs: James Hebditch (1), Mendell Lopez (6).                                                                     |
| 27 | FLAa2 | 720575940604764862 | 7  |    | 6  |    | 13 |  | Jefferis Lab: Irene Salgarella (2). Murthy and Seung Labs: Mendell Lopez (1).                                                                                                              |
| 28 | FLAa2 | 720575940628857850 |    |    | 13 |    | 13 |  | Wolf Lab: fred wolf (1). Jefferis Lab: Arti Yadav (1), Yijie Yin (4). Murthy and Seung Labs: Mendell Lopez (3), remer tancontian (1).                                                      |
| 29 | FLAa2 | 720575940638900469 | 6  |    | 6  |    | 12 |  | Jefferis Lab: Irene Salgarella (4).                                                                                                                                                        |

|    |                   |                    |    |    |    |    |  |     |                                                                                                                                                                                                                                                                                                                                    |
|----|-------------------|--------------------|----|----|----|----|--|-----|------------------------------------------------------------------------------------------------------------------------------------------------------------------------------------------------------------------------------------------------------------------------------------------------------------------------------------|
| 30 | FLAa2             | 720575940619398872 | 12 |    |    |    |  |     | Jefferis Lab: A. Javier (1), Chitra Nair (1), Dickson Lab: Alisa Poh (13), Murthy and Seung Labs: Zairene Lenizo (4).                                                                                                                                                                                                              |
| 31 | FLAa2             | 720575940631044141 | 6  |    | 6  |    |  | 12  | Murthy and Seung Labs: James Hebditch (2), Jefferis Lab: Arti Yadav (1).                                                                                                                                                                                                                                                           |
| 32 | FLAa2             | 720575940638996413 |    | 5  | 7  |    |  | 12  | Dickson Lab: Alisa Poh (8), Murthy and Seung Labs: Kyle Patrick Willie (2), Shirleyjoy Serona (3), Kendrick Joules Vinson (1), Joshua Bañez (1), James Hebditch (1), Jefferis Lab: Arti Yadav (1), Bhargavi Parmar (1).                                                                                                            |
| 33 | FLAa2             | 720575940624735565 | 6  |    | 5  |    |  | 11  | Dickson Lab: Alisa Poh (1), Jefferis Lab: Varun Sane (1), Arti Yadav (1), Murthy and Seung Labs: Ryan Willie (24), Rey Adrian Candilada (1).                                                                                                                                                                                       |
| 34 | FLAa2             | 720575940622266748 |    | 5  |    | 5  |  | 10  | Jefferis Lab: Rashmita Rana (1), Zeba Vohra (1), Murthy and Seung Labs: Shirleyjoy Serona (15).                                                                                                                                                                                                                                    |
| 35 | FLAa2             | 720575940644327022 |    | 5  | 5  |    |  | 10  | Murthy and Seung Labs: James Hebditch (2), Jefferis Lab: Arti Yadav (1), Murthy and Seung Labs: J. Dolorosa (7).                                                                                                                                                                                                                   |
| 36 | FLAa2             | 720575940637002724 | 8  |    |    |    |  | 8   | Jefferis Lab: Imaan Tamimi (1), Irene Salgarella (5), Murthy and Seung Labs: Darrel Jay Akiatan (2), J. Anthony Ocho (18).                                                                                                                                                                                                         |
| 37 | FLAa2             | 720575940612348438 |    |    |    | 8  |  | 8   | Jefferis Lab: Anjali Pandey (1), Murthy and Seung Labs: Zairene Lenizo (2), Kendrick Joules Vinson (4), Rey Adrian Candilada (3).                                                                                                                                                                                                  |
| 38 | FLAa2             | 720575940623063847 | 8  |    |    |    |  | 8   | Jefferis Lab: Arti Yadav (1), Murthy and Seung Labs: Shirleyjoy Serona (17).                                                                                                                                                                                                                                                       |
| 39 | FLAa2             | 720575940616872337 |    | 7  |    |    |  | 7   | Jefferis Lab: Rashmita Rana (1), Murthy and Seung Labs: Ben Silverman (8), Kendrick Joules Vinson (6), Kyle Patrick Willie (1).                                                                                                                                                                                                    |
| 40 | FLAa2             | 720575940626982165 |    | 6  |    |    |  | 6   | Seung Lab: Zhihao Zheng (4), Jefferis Lab: Irene Salgarella (4), Yijie Yin (2), Murthy and Seung Labs: Nash Hadjerol (8).                                                                                                                                                                                                          |
| 41 | FLAa2             | 720575940619403435 |    | 5  |    |    |  | 5   | Jefferis Lab: Marta Costa (3), Irene Salgarella (1), Anjali Pandey (1), Varun Sane (18).                                                                                                                                                                                                                                           |
| 42 | FLAa2             | 720575940626742532 |    |    | 5  |    |  | 5   | Jefferis Lab: Marta Costa (3), Irene Salgarella (1), Anjali Pandey (1), Varun Sane (18).                                                                                                                                                                                                                                           |
| 43 | FLAa2             | 720575940630393427 |    |    | 5  |    |  | 5   | Jefferis Lab: Irene Salgarella (9).                                                                                                                                                                                                                                                                                                |
| 44 | FLAa2             | 720575940616510425 |    | 5  |    |    |  | 5   | Dickson Lab: Alisa Poh (5), Murthy and Seung Labs: Rey Adrian Candilada (1).                                                                                                                                                                                                                                                       |
| 45 | FLAa2             | 720575940634776511 |    |    | 5  |    |  | 5   | Jefferis Lab: Imaan Tamimi (2), Arti Yadav (1), Dickson Lab: Alisa Poh (2), Murthy and Seung Labs: Mendell Lopez (8), Ariel Dagohoy (19), Joshua Bañez (2), Ben Silverman (1).                                                                                                                                                     |
| 46 | FLAa2             | 720575940605589378 |    |    |    | 5  |  | 5   | 1080<br>Jefferis Lab: Arti Yadav (1), Murthy and Seung Labs: Austin T Burke (15), Zairene Lenizo (1).                                                                                                                                                                                                                              |
| 47 | Handshake         | 720575940651601910 | 54 | 51 | 51 | 35 |  | 191 | Jefferis and Waddell Labs: Joseph Hsu (1), Wolf Lab: fred wolf (1), Scott Lab: Amanda Abusaif (2), Murthy and Seung Labs: Ariel Dagohoy (2), J. Anthony Ocho (2), Shirleyjoy Serona (13), Jefferis Lab: Sangeeta Sisodiya (23).                                                                                                    |
| 48 | Handshake         | 720575940626449158 | 46 | 46 | 42 | 37 |  | 171 | Jefferis and Waddell Labs: Joseph Hsu (1), Scott Lab: Amanda Abusaif (1).                                                                                                                                                                                                                                                          |
| 49 | Handshake         | 720575940618791515 | 45 | 51 | 49 | 38 |  | 183 | Wolf Lab: fred wolf (2), Scott Lab: Amanda Abusaif (3).                                                                                                                                                                                                                                                                            |
| 50 | Handshake         | 720575940622839786 | 39 | 56 | 44 | 38 |  | 177 | 722<br>Jefferis and Waddell Labs: Joseph Hsu (1), Jefferis Lab: Laia Serratos (1), Rashmita Rana (1), Dickson Lab: Alisa Poh (1), Murthy and Seung Labs: Kyle Patrick Willie (4), remer tancontian (5), Austin T Burke (8), Itisha Joshi (15).                                                                                     |
| 51 | Cowboy L fragment | 720575940611730674 | 72 | 95 | 75 | 59 |  | 301 | Simpson Lab: Li Guo (7), Jefferis Lab: Yijie Yin (2), Siqi Fang (3), Scott Lab: Amanda González-Segarra (7), Amanda Abusaif (1), Murthy and Seung Labs: J. Anthony Ocho (2), Mendell Lopez (1), Shaina Mae Monungolh (7), Ben Silverman (1), Nash Hadjerol (1), remer tancontian (1), Miguel Albero (2), Rey Adrian Candilada (2). |
| 52 | Cowboy R          | 720575940624514492 | 36 | 51 | 38 | 34 |  | 159 | 460<br>Jefferis and Wilson Labs: Laia Serratos Capdevila (6), Jefferis Lab: Yijie Yin (6), Katharina Eichler (2), Zeba Vohra (18), Scott Lab: Amanda Abusaif (6), Murthy and Seung Labs: J. Dolorosa (1), Austin T Burke (10), Darrel Jay Akiatan (13)                                                                             |

|    |                            |                    |    |    |    |    |     |                                                                                                                                                                                                                                                                                                                                                                                                                                                                                                                  |
|----|----------------------------|--------------------|----|----|----|----|-----|------------------------------------------------------------------------------------------------------------------------------------------------------------------------------------------------------------------------------------------------------------------------------------------------------------------------------------------------------------------------------------------------------------------------------------------------------------------------------------------------------------------|
| 53 | SEZ:<br>GNG.GNG.<br>2607   | 720575940633170969 | 37 | 30 | 33 | 24 | 124 | Murthy and Seung Labs: Ryan Willie (32), Joshua Bañez (1), remer tancontian (1), Nash Hadjerol (1). Jefferis Lab: Katharina Eichler (1), Dhvani Patel (4), Griffin Badalemente (2), Dharini Sapkal (1).                                                                                                                                                                                                                                                                                                          |
| 54 | SEZ:<br>PRW.GNG.<br>9      | 720575940616167730 | 35 | 19 | 40 | 21 | 115 | Jefferis Lab: Arti Yadav (1), Griffin Badalemente (2), Dharini Sapkal (5), Yashvi Patel (2), Bhargavi Parmar (1). Scott Lab: Amanda González-Segarra (3). Murthy and Seung Lab: Mendell Lopez (12).                                                                                                                                                                                                                                                                                                              |
| 55 | SEZ:<br>PRW.PRW<br>.166    | 720575940622732253 | 5  | 12 | 17 |    | 34  | Jefferis Lab: Rashmita Rana (1), Zeba Vohra (4). Murthy and Seung Labs: Shirleyjoy Serona (55), Austin T Burke (1). Kim Lab: Chan Hyuk Kang (1).                                                                                                                                                                                                                                                                                                                                                                 |
| 56 | SEZ:<br>PRW.PRW<br>.214    | 720575940625178768 | 8  | 6  |    | 17 | 31  | Jefferis Lab: Rashmita Rana (1), Sangeeta Sisodiya (1). Murthy and Seung Labs: Ben Silverman (7), Shirleyjoy Serona (23), Austin T Burke (1), Zairene Lenizo (4), Kyle Patrick Willie (2).                                                                                                                                                                                                                                                                                                                       |
| 57 | SEZ:<br>PRW.GNG.<br>6      | 720575940614736290 | 8  | 8  | 5  | 5  | 26  | Murthy and Seung Labs: Ryan Willie (1), Ben Silverman (1), J. Anthony Ocho (37), Nash Hadjerol (2). Jefferis Lab: Chitra Nair (1), Yashvi Patel (1).                                                                                                                                                                                                                                                                                                                                                             |
| 58 | SEZ:<br>PRW.GNG.<br>12     | 720575940619042427 |    |    | 8  |    | 8   | Seeds Hampel Lab: Patricia Pujols (7). Murthy and Seung Labs: Zairene Lenizo (4), Rey Adrian Candilada (1), remer tancontian (1), Kendrick Joules Vinson (1). Jefferis Lab: Bhargavi Parmar (5).                                                                                                                                                                                                                                                                                                                 |
| 59 | SEZ:<br>PRW.PRW<br>.146    | 720575940621490721 |    |    |    | 6  | 6   | Jefferis Lab: Arti Yadav (1). Murthy and Seung Labs: J. Anthony Ocho (2), Ben Silverman (3), Shaina Mae Monungolh (1), Kyle Patrick Willie (4).                                                                                                                                                                                                                                                                                                                                                                  |
| 60 | SEZ:<br>GNG.GNG.<br>1075   | 720575940620627803 | 5  |    |    |    | 5   | Jefferis Lab: Shanice Bailey (3), Rashmita Rana (1), Dhvani Patel (1). Murthy and Seung Labs: J. Anthony Ocho (1).                                                                                                                                                                                                                                                                                                                                                                                               |
| 61 | SEZ:<br>PRW.PRW<br>.42     | 720575940613120721 |    |    | 5  |    | 5   | Murthy and Seung Labs: Nash Hadjerol (9). Kim Lab: hanetwo (1).                                                                                                                                                                                                                                                                                                                                                                                                                                                  |
| 62 | SEZ:<br>PRW.PRW<br>.62     | 720575940615052812 |    |    | 5  |    | 5   | Jefferis Lab: Arti Yadav (1). Murthy and Seung Labs: Austin T Burke (1), Zairene Lenizo (2), Rey Adrian Candilada (1), Szi-chieh Yu (1). Jefferis Lab: Dharini Sapkal (1).                                                                                                                                                                                                                                                                                                                                       |
| 63 | SEZ:<br>PRW.PRW<br>.199    | 720575940624532408 |    |    | 5  |    | 5   | Jefferis Lab: Arti Yadav (1). Murthy and Seung Labs: Jay Gager (9), Itisha Joshi (2).                                                                                                                                                                                                                                                                                                                                                                                                                            |
| 64 | SEZ:<br>FLA_L.FLA<br>_L.47 | 720575940631299602 |    |    | 5  |    | 5   | Jefferis Lab: Katharina Eichler (10), Laia Serratosa (1), Marina Gkantia (1), Bhargavi Parmar (28), Dharini Sapkal (10). Murthy and Seung Labs: J. Anthony Ocho (1), Zairene Lenizo (4), Shirleyjoy Serona (41), Darrel Jay Akiatan (1). Scott Lab: Amanda Abusaif (2). Itisha Joshi (5).                                                                                                                                                                                                                        |
| 65 | SEZ:<br>PRW.PRW<br>.120    | 720575940619866059 |    |    | 5  |    | 5   | Jefferis Lab: Yijie Yin (1), Rashmita Rana (1), Zeba Vohra (10). Murthy and Seung Labs: Michelle Pantujan (1), Zairene Lenizo (1), regine salem (88), Rey Adrian Candilada (1), remer tancontian (3)                                                                                                                                                                                                                                                                                                             |
| 66 | SEZ:<br>TRdm               | 720575940612921571 |    |    | 5  |    | 5   | 379<br>Murthy and Seung Labs: Doug Bland (5). Jefferis Lab: Imaan Tamimi (1), Laia Serratosa (1), Griffin Badalemente (1), Dhvani Patel (15).                                                                                                                                                                                                                                                                                                                                                                    |
| 67 | DSOG 1                     | 720575940617291323 | 32 | 33 | 36 | 22 | 123 | Seeds Hampel Lab: Katharina Eichler (10). Jefferis and Wilson Labs: Laia Serratosa Capdevila (2). Jefferis Lab: A. Javier (8), Katharina Eichler (1), Yijie Yin (1), Dharini Sapkal (47), Arzoo Diwan (6), Dhara Kakadiya (7), Zeba Vohra (9), Dhvani Patel (10), Yashvi Patel (1). Scott Lab: Amanda Abusaif (21). Pankratz Lab: Damian Demarest (1). Murthy and Seung Labs: remer tancontian (6), J. Dolorosa (54), Kendrick Joules Vinson (3), Shaina Mae Monungolh (2), Zairene Lenizo (2). Itisha Joshi (5) |
| 68 | DSOG 1                     | 720575940623529610 | 28 | 27 | 32 | 31 | 118 | Seeds Hampel Lab: Katharina Eichler (3). Jefferis and Wilson Labs: Laia Serratosa Capdevila (8). Jefferis Lab: Irene Salgarella (3), Yijie Yin (2), Zeba Vohra (7), Arti Yadav (16), Bhargavi Parmar (25), Chitra Nair (39), Dhara Kakadiya (4). Scott Lab: Amanda Abusaif (12). Murthy and Seung Labs: Celia D (1), remer tancontian (2), Austin T Burke (4), Zairene Lenizo (1), Shaina Mae Monungolh (26), Rey Adrian Candilada (1), Shirleyjoy Serona (24), J. Anthony Ocho (3). Itisha Joshi (6)            |



|    |                            |                    |    |    |    |    |     |     |                                                                                                                                                                                                                                                                                                                                                                                                                                                                                                                                                                                                                                                                                                                                                                                                                                                                                                                                                                                                                         |
|----|----------------------------|--------------------|----|----|----|----|-----|-----|-------------------------------------------------------------------------------------------------------------------------------------------------------------------------------------------------------------------------------------------------------------------------------------------------------------------------------------------------------------------------------------------------------------------------------------------------------------------------------------------------------------------------------------------------------------------------------------------------------------------------------------------------------------------------------------------------------------------------------------------------------------------------------------------------------------------------------------------------------------------------------------------------------------------------------------------------------------------------------------------------------------------------|
| 69 | DSOG 1                     | 720575940623338281 | 19 | 14 | 8  | 8  | 49  |     | Seeds Hampel Lab: Katharina Eichler (8). Jefferis Lab: Siqi Fang (14), Katharina Eichler (4), Irene Salgarella (2), Griffin Badalemente (7), Nidhi Patel (3), Zeba Vohra (15), Dhvani Patel (10), Chitra Nair (8), Yashvi Patel (15), Dharini Sapkal (19), Arti Yadav (4). Murthy and Seung Labs: Rey Adrian Candilada (6), Shaina Mae Monungolh (45). Kim Lab: Chan Hyuk Kang (2). Scott Lab: Amanda Abusaif (12).                                                                                                                                                                                                                                                                                                                                                                                                                                                                                                                                                                                                     |
| 70 | DSOG 1                     | 720575940644666660 | 13 | 5  | 17 | 5  | 40  | 330 | Seeds Hampel Lab: Katharina Eichler, Steven Calle, Lucia Kmecova, Alexis E Santana Cruz. Murthy and Seung Labs: remer tancontian, Zairene Lenizo.                                                                                                                                                                                                                                                                                                                                                                                                                                                                                                                                                                                                                                                                                                                                                                                                                                                                       |
| 71 | SEZ & SMP: FLA_L.SM P_L.27 | 720575940626500362 | 19 | 5  | 18 | 8  | 50  |     | Jefferis Lab: Greg Jefferis (2). Dickson Lab: Alisa Poh (1). Murthy and Seung Labs: Shirleyjoy Serona (25), regine salem (17), Mendell Lopez (1), Shaina Mae Monungolh (2).                                                                                                                                                                                                                                                                                                                                                                                                                                                                                                                                                                                                                                                                                                                                                                                                                                             |
| 72 | SEZ & SMP: VESa1           | 720575940632951597 | 12 |    | 19 | 16 | 47  |     | Murthy and Seung Labs: Austin T Burke (72), Sarah Morejohn (1), Kyle Patrick Willie (11), James Hebditch (6), Doug Bland (5), Nash Hadjerol (39), Ben Silverman (7), J. Dolorosa (3), Zairene Lenizo (48), Mendell Lopez (9), Shaina Mae Monungolh (5), Rey Adrian Candilada (7), regine salem (80), remer tancontian (19), Darrel Jay Akiatan (13), Joshua Bañez (112), Ariel Dagohoy (9), Kendrick Joules Vinson (27), Miguel Albero (4), Shirleyjoy Serona (89), Michelle Pantujan (14), J. Anthony Ocho (11). Jefferis and Wilson Labs: Laia Serratos Capdevila (6). Jefferis Lab: Marlon Blanquart (1), Imaan Tamimi (5), Yijie Yin (3), Irene Salgarella (3), Varun Sane (4), Griffin Badalemente (21), Philipp Schlegel (9), Dharini Sapkal (35), Chitra Nair (34), Arzoo Diwan (8), Zeba Vohra (24), Anjali Pandey (2), Dhara Kakadiya (48), Bhargavi Parmar (10), Kaushik Parmar (1), Arti Yadav (10), Yashvi Patel (12), Greg Jefferis (1). Janelia Tracers: Tansy Yang (38). Selcho Lab: Mareike Selcho (1). |
| 73 | SEZ & SMP: FLA_L.SM P_L.32 | 720575940627436554 | 12 | 16 | 6  | 12 | 46  |     | Jefferis Lab: Greg Jefferis (1), Christophe Dunne (1), Bhargavi Parmar (1). Murthy and Seung Labs: Mendell Lopez (1), Joshua Bañez (2).                                                                                                                                                                                                                                                                                                                                                                                                                                                                                                                                                                                                                                                                                                                                                                                                                                                                                 |
| 74 | SEZ & SMP: FLA_R.SM P_R.32 | 720575940645920052 | 7  |    | 17 | 13 | 37  |     | Jefferis and Wilson Labs: Laia Serratos Capdevila (1). Wolf Lab: fred wolf (1). Huetteroth Lab: Wolf Huetteroth (1). Murthy and Seung Labs: Zairene Lenizo (6), Shirleyjoy Serona (29), Ariel Dagohoy (28), Shaina Mae Monungolh (11). Jefferis Lab: Márcia Santos (1).                                                                                                                                                                                                                                                                                                                                                                                                                                                                                                                                                                                                                                                                                                                                                 |
| 75 | SEZ & SMP: BIT2            | 720575940621662332 | 7  | 7  | 14 | 8  | 36  |     | Murthy and Seung Labs: Austin T Burke (47), Joshua Bañez (9), Kyle Patrick Willie (16). Jefferis Lab: Imaan Tamimi (12), Yijie Yin (2), Bhargavi Parmar (2), Dharini Sapkal (1). Scott Lab: Amanda Abusaif (14).                                                                                                                                                                                                                                                                                                                                                                                                                                                                                                                                                                                                                                                                                                                                                                                                        |
| 76 | SEZ & SMP: FLA_R.SM P_R.30 | 720575940637780969 | 5  | 5  | 10 | 14 | 34  |     | Jefferis Lab: Arti Yadav (1), Dhvani Patel (5). Murthy and Seung Labs: Shirleyjoy Serona (3), Ryan Willie (2), Kyle Patrick Willie (2), Rey Adrian Candilada (1).                                                                                                                                                                                                                                                                                                                                                                                                                                                                                                                                                                                                                                                                                                                                                                                                                                                       |
| 77 | SEZ & SMP: Lgr3/FLAa 3     | 720575940626452879 | 8  | 15 | 9  |    | 32  |     | Jefferis Lab: Yijie Yin (1), Anjali Pandey (1). Murthy and Seung Labs: James Hebditch (1), Mendell Lopez (21), Austin T Burke (3), Joshua Bañez (3), Kendrick Joules Vinson (4).                                                                                                                                                                                                                                                                                                                                                                                                                                                                                                                                                                                                                                                                                                                                                                                                                                        |
| 78 | SEZ & SMP: SMPpv2          | 720575940623701768 |    | 6  | 9  |    | 15  |     | Jefferis Lab: Greg Jefferis (1), Yijie Yin (2), A. Javier (3), Irene Salgarella (5). Scott Lab: Amanda Abusaif (1). Murthy and Seung Labs: Szi-chieh Yu (15), Zairene Lenizo (9).                                                                                                                                                                                                                                                                                                                                                                                                                                                                                                                                                                                                                                                                                                                                                                                                                                       |
| 79 | SEZ & SMP: SMPpv2          | 720575940628310275 |    | 7  |    | 5  | 12  |     | Jefferis and Wilson Labs: Laia Serratos Capdevila (9). Jefferis Lab: Katharina Eichler (9), Imaan Tamimi (5), Irene Salgarella (4), Philipp Schlegel (39). Murthy and Seung Labs: James Hebditch (1), Rey Adrian Candilada (10).                                                                                                                                                                                                                                                                                                                                                                                                                                                                                                                                                                                                                                                                                                                                                                                        |
| 80 | SEZ & SMP: Lgr3/FLAa 3     | 720575940629764906 |    | 5  |    |    | 5   |     | Jefferis and Waddell Labs: Joseph Hsu (3). Murthy and Seung Labs: Austin T Burke (14). Jefferis Lab: Anjali Pandey (1).                                                                                                                                                                                                                                                                                                                                                                                                                                                                                                                                                                                                                                                                                                                                                                                                                                                                                                 |
| 81 | SEZ & SMP: Gallinule       | 720575940618926757 |    |    |    | 5  | 5   | 319 | Jefferis and Waddell Labs: Joseph Hsu (8). Jefferis Lab: Yijie Yin (4), Imaan Tamimi (1), Rashmita Rana (2). Murthy and Seung Labs: Mendell Lopez (2).                                                                                                                                                                                                                                                                                                                                                                                                                                                                                                                                                                                                                                                                                                                                                                                                                                                                  |
| 82 | BIT                        | 720575940610708430 | 71 | 74 | 93 | 63 | 301 | 301 | Jefferis Lab: Yijie Yin (3), A. Javier (1), Imaan Tamimi (22), Varun Sane (2), Griffin Badalemente (1), Dhara Kakadiya (1), Arti Yadav (6). Murthy and Seung Labs: Claire McKellar (1), Michelle Pantujan (2), Austin T Burke (2), James Hebditch (1), J. Anthony Ocho (420), Rey Adrian Candilada (1), Nash Hadjerol (4). Wes Murfin (1). Scott Lab: Amanda Abusaif (30).                                                                                                                                                                                                                                                                                                                                                                                                                                                                                                                                                                                                                                              |

|    |                                          |                    |    |    |    |    |    |                                                                                                                                                                                                                                                                                                                                                                                                                                                                                                                                                                                                        |                                                                        |
|----|------------------------------------------|--------------------|----|----|----|----|----|--------------------------------------------------------------------------------------------------------------------------------------------------------------------------------------------------------------------------------------------------------------------------------------------------------------------------------------------------------------------------------------------------------------------------------------------------------------------------------------------------------------------------------------------------------------------------------------------------------|------------------------------------------------------------------------|
| 83 | Ascending neuron:<br>FLA_R.PR<br>W.5     | 720575940625841241 | 20 | 6  | 16 | 27 | 69 | Seeds Hampel Lab: Steven Calle (1). Jefferis Lab: Katharina Eichler (8). Kim Lab: Chan Hyuk Kang (2). Murthy and Seung Labs: M Sorek (2), J. Anthony Ocho (1), Zairene Lenizo (1).                                                                                                                                                                                                                                                                                                                                                                                                                     |                                                                        |
| 84 | Ascending neurons:<br>PRW.FLA_<br>L.15   | 720575940633548128 |    | 29 | 33 | 5  | 67 | Jefferis and Wilson Labs: Laia Serratos Capdevila (11). Scott Lab: Zepeng Yao (1), Amanda Abusaif (2), Amanda González-Segarra (5), Rey Adrian Candilada (4).                                                                                                                                                                                                                                                                                                                                                                                                                                          |                                                                        |
| 85 | Ascending neuron:<br>FLA_L.FLA<br>_L.25  | 720575940621599741 | 19 | 18 |    | 5  | 42 | Jefferis and Waddell Labs: Joseph Hsu (3). Jefferis and Wilson Labs: Laia Serratos Capdevila (3).                                                                                                                                                                                                                                                                                                                                                                                                                                                                                                      |                                                                        |
| 86 | Ascending neuron:<br>PRW.SMP<br>_L.30    | 720575940635527092 | 8  | 5  | 14 | 11 | 38 | Seeds Hampel Lab: Katharina Eichler (27). Jefferis and Wilson Labs: Laia Serratos Capdevila (15). Jefferis Lab: Katharina Eichler (1), Varun Sane (1), Irene Salgarella (1), Bhargavi Parmar (10), Chitra Nair (40), Sangeeta Sisodiya (18), Zeba Vohra (4), Bhargavi Parmar (10), Dharini Sapkal (1). Murthy and Seung Labs: Zairene Lenizo (5), J. Anthony Ocho (3), Nash Hadjerol (5), Mendell Lopez (3), Joshua Bañez (4), regine salem (1), Rey Adrian Candilada (1), Kendrick Joules Vinson (3), Ariel Dagohey (8), Kyle Patrick Willie (4), Doug Bland (31), Ryan Willie (1). Itisha Joshi (25) |                                                                        |
| 87 | Ascending neuron:<br>FLA_R.PR<br>W.2     | 720575940611548273 | 10 | 11 | 5  |    | 26 | Jefferis and Wilson Labs: Laia Serratos Capdevila (11). Murthy and Seung Labs: Mendell Lopez (1), Zairene Lenizo (2), Kyle Patrick Willie (4).                                                                                                                                                                                                                                                                                                                                                                                                                                                         |                                                                        |
| 88 | Ascending neuron:<br>PRW.PRW<br>.304     | 720575940631295506 | 7  |    | 9  |    | 16 | Jefferis and Wilson Labs: Laia Serratos Capdevila (3). Murthy and Seung Labs: Shaina Mae Monungolh (2), Nash Hadjerol (7). Jefferis Lab: Dhvani Patel (1).                                                                                                                                                                                                                                                                                                                                                                                                                                             |                                                                        |
| 89 | Ascending neuron:<br>PRW.PRW<br>.343     | 720575940636263543 | 5  |    | 8  |    | 13 | Seung Lab: Zhihao Zheng (1). Jefferis Lab: Katharina Eichler (1), Dharini Sapkal (5). Murthy and Seung Labs: Michelle Pantujan (2), Nash Hadjerol (7), Shaina Mae Monungolh (1). Dickson Lab: Alisa Poh (2).                                                                                                                                                                                                                                                                                                                                                                                           |                                                                        |
| 90 | Ascending neuron:<br>PRW.PRW<br>.137     | 720575940620833901 |    |    | 6  | 6  | 12 | Murthy and Seung Labs: James Hebditch (9), Austin T Burke (11), Ben Silverman (1), Nash Hadjerol (3), Mendell Lopez (18), Ryan Willie (1), regine salem (3), Joshua Bañez (6), Rey Adrian Candilada (5), Zairene Lenizo (7), Darrel Jay Akiatan (3). Jefferis and Wilson Labs: Laia Serratos Capdevila (3). Jefferis Lab: Katharina Eichler (10), Sangeeta Sisodiya (1), Dharini Sapkal (1), Bhargavi Parmar (37), Chitra Nair (17). Seeds Hampel Lab: Alexis E Santana Cruz (1).                                                                                                                      |                                                                        |
| 91 | Ascending neuron:<br>PRW.PRW<br>.247     | 720575940627304424 |    |    |    | 10 | 10 | Jefferis Lab: Dharini Sapkal (1). Murthy and Seung Labs: Shirleyjoy Serona (16), Zairene Lenizo (1), Rey Adrian Candilada (3).                                                                                                                                                                                                                                                                                                                                                                                                                                                                         |                                                                        |
| 92 | Ascending neuron:<br>FLA_L.GN<br>G.5     | 720575940617662950 |    |    | 6  |    | 6  | 299                                                                                                                                                                                                                                                                                                                                                                                                                                                                                                                                                                                                    | Jefferis Lab: Katharina Eichler. Murthy and Seung Labs: Ben Silverman. |
| 93 | Descending neuron:<br>PRW.GNG.<br>16     | 720575940621328048 | 7  | 16 | 15 | 9  | 47 | Jefferis and Wilson Labs: Laia Serratos Capdevila (3). Jefferis Lab: Katharina Eichler (1), Arti Yadav (1), Dharini Sapkal (1), Dhvani Patel (1), Bhargavi Parmar (31). Murthy and Seung Labs: Austin T Burke (1), Mendell Lopez (1), Shaina Mae Monungolh (7), Ariel Dagohey (1). Itisha Joshi (5).                                                                                                                                                                                                                                                                                                   |                                                                        |
| 94 | Descending neuron:<br>FLA_L.GN<br>G.3    | 720575940610610841 | 9  |    |    | 5  | 14 | Jefferis and Wilson Labs: Laia Serratos Capdevila (14). Jefferis Lab: A. Javier (9), Yijie Yin (3), Katharina Eichler (1), Rashmita Rana (1).                                                                                                                                                                                                                                                                                                                                                                                                                                                          |                                                                        |
| 95 | Descending neuron:<br>FLA_L.NO<br>_OUT.7 | 720575940625587325 | 7  |    | 5  |    | 12 | Jefferis Lab: Philipp Schlegel (1), Katharina Eichler (15), Paul Brooks (45). Jefferis and Wilson Labs: Laia Serratos Capdevila (3). Selcho Lab: Mareike Selcho (7). Kim Lab: Usb (1).                                                                                                                                                                                                                                                                                                                                                                                                                 |                                                                        |
| 96 | Descending neuron:<br>GNG.GNG.<br>1079   | 720575940620668609 |    |    | 12 |    | 12 | Seeds Hampel Lab: Katharina Eichler (2), Stefanie Hampel (1). Jefferis and Wilson Labs: Laia Serratos Capdevila (1). Jefferis Lab: Griffin Badalemente (1), Dhvani Patel (30), Dharini Sapkal (18). Murthy and Seung Labs: regine salem (1).                                                                                                                                                                                                                                                                                                                                                           |                                                                        |

|     |                                   |                    |   |   |   |    |                                                                                                                                                                                                                                                                |                                                                                                                                                                                                                                                                                                                                        |                                                                                                                                                                                                                                 |
|-----|-----------------------------------|--------------------|---|---|---|----|----------------------------------------------------------------------------------------------------------------------------------------------------------------------------------------------------------------------------------------------------------------|----------------------------------------------------------------------------------------------------------------------------------------------------------------------------------------------------------------------------------------------------------------------------------------------------------------------------------------|---------------------------------------------------------------------------------------------------------------------------------------------------------------------------------------------------------------------------------|
| 97  | Descending Neuron: Gumdrop        | 720575940630697078 | 5 |   | 6 | 11 | Jefferis and Wilson Labs: Laia Serratos Capdevila (21).<br>Jefferis Lab: Katharina Eichler (30), Imaan Tamimi (1), Yashvi Patel (5), Arti Yadav (10), Zeba Vohra (23), Bhargavi Parmar (15).<br>Murthy and Seung Labs: Nash Hadjerol (5).<br>Itisha Joshi (8). |                                                                                                                                                                                                                                                                                                                                        |                                                                                                                                                                                                                                 |
| 98  | Descending neuron: FLA_L.NO_OUT.5 | 720575940619576001 | 6 |   | 5 | 11 | Jefferis and Wilson Labs: Laia Serratos Capdevila (3).<br>Jefferis Lab: Katharina Eichler (17), Paul Brooks (28), Imaan Tamimi (1), Yijie Yin (8).<br>Murthy and Seung Labs: Michelle Pantujan (1), J. Dolorosa (1), Ben Silverman (14).                       |                                                                                                                                                                                                                                                                                                                                        |                                                                                                                                                                                                                                 |
| 99  | Descending neuron                 | 720575940644812398 |   | 6 | 5 | 11 | Jefferis and Wilson Labs: Laia Serratos Capdevila (4).<br>Jefferis Lab: A. Javier (24), Katharina Eichler (4), Rashmita Rana (1), Varun Sane (1).<br>Selcho Lab: Mareike Selcho (8).<br>Murthy and Seung Labs: Joshua Bañez (1).                               |                                                                                                                                                                                                                                                                                                                                        |                                                                                                                                                                                                                                 |
| 100 | Descending neuron: GNG.GNG.391    | 720575940612692889 | 6 |   |   | 6  | 124                                                                                                                                                                                                                                                            | Jefferis and Wilson Labs: Laia Serratos Capdevila (2).<br>Jefferis Lab: Katharina Eichler (2), Zeba Vohra (1), Yashvi Patel (2).<br>Murthy and Seung Labs: Shirleyjoy Serona (253), Darrel Jay Akiatan (5).                                                                                                                            |                                                                                                                                                                                                                                 |
| 101 | ISN                               | 720575940625627932 | 5 | 6 |   | 5  | 16                                                                                                                                                                                                                                                             | Scott Lab: Alexander Edward Del Toro BSc (1).<br>Jefferis Lab: Arti Yadav (1).<br>Kim Lab: Hyungjun Choi (183), Chan Hyuk Kang (26), hanetwo (5).<br>Murthy and Seung Labs: Ariel Dagohoy (2), Rey Adrian Candilada (3).                                                                                                               |                                                                                                                                                                                                                                 |
| 102 | ISN                               | 720575940619731393 |   | 5 |   | 5  | 10                                                                                                                                                                                                                                                             | Jefferis Lab: Katharina Eichler (1).<br>Murthy and Seung Labs: Claire McKellar (1), Nash Hadjerol (2), Celia D (1), regine salem (332), Joshua Bañez (286), Kendrick Joules Vinson (8), J. Anthony Ocho (1).<br>Scott Lab: Amanda González-Segarra (3), Alexander Edward Del Toro BSc (1).<br>Kim Lab: Keehyun Park (6), hanetwo (19). |                                                                                                                                                                                                                                 |
| 103 | ISN                               | 720575940628363855 |   |   | 5 |    | 5                                                                                                                                                                                                                                                              | Kim Group: Hyungjun Choi (29), Chan Hyuk Kang (25), hanetwo (3).<br>Murthy and Seung Labs: Shaina Mae Monungolh (5), Joshua Bañez (1), Shirleyjoy Serona (126), Zairene Lenizo (1).                                                                                                                                                    |                                                                                                                                                                                                                                 |
| 104 | ISN                               | 720575940624153528 |   |   | 5 |    | 5                                                                                                                                                                                                                                                              | 20                                                                                                                                                                                                                                                                                                                                     | Scott Lab: Amanda González-Segarra (1).<br>Jefferis Lab: Anjali Pandey (1), Varun Sane (1).<br>Kim Lab: Keehyun Park (1), hanetwo (22).<br>Murthy and Seung Labs: Nash Hadjerol (12), Zairene Lenizo (4), remer tancontian (1). |
|     |                                   |                    |   |   |   |    |                                                                                                                                                                                                                                                                | 4034                                                                                                                                                                                                                                                                                                                                   |                                                                                                                                                                                                                                 |

921  
922  
923  
924  
925  
926  
927

**Table S2: BiT postsynaptic neurons**

|   | Name | Neuron ID          | Synapses from BiT | Total synapses from BiT per cell type | Tracing contributions (number of edits)                                                                                                |
|---|------|--------------------|-------------------|---------------------------------------|----------------------------------------------------------------------------------------------------------------------------------------|
| 1 | IPC  | 720575940650527222 | 54                |                                       | Jefferis Lab: Imaan Tamimi (2), Anjali Pandey (1).<br>Murthy and Seung Labs: Austin T Burke (4).                                       |
| 2 | IPC  | 720575940603765280 | 44                |                                       | Maimon Lab: Gaby Maimon (1).<br>Jefferis Lab: Katharina Eichler (2).<br>Murthy and Seung Labs: Austin T Burke (3).                     |
| 3 | IPC  | 720575940620932045 | 39                |                                       | Jefferis Lab: Imaan Tamimi (2), Laia Serratos (7).<br>Murthy and Seung Labs: Austin T Burke (6).                                       |
| 4 | IPC  | 720575940612923390 | 33                |                                       | Jefferis Lab: Imaan Tamimi (1), Laia Serratos (6), Markus Pleijzier (1), Rashmita Rana (1).<br>Murthy and Seung Labs: Ryan Willie (1). |
| 5 | IPC  | 720575940625379859 | 30                |                                       | Jefferis Lab: A. Javier (4), Irene Salgarella (2), Laia Serratos (9).<br>Murthy and Seung Labs: Austin T Burke (4).                    |

|    |                               |                    |    |     |                                                                                                                                                                                                                                                            |
|----|-------------------------------|--------------------|----|-----|------------------------------------------------------------------------------------------------------------------------------------------------------------------------------------------------------------------------------------------------------------|
| 6  | IPC                           | 720575940622897639 | 28 |     | Seung Lab: Zhihao Zheng (1), Jefferis Lab: A. Javier (1), Dacks Lab: Andrew Dacks (1), Murthy and Seung Labs: Austin T Burke (7).                                                                                                                          |
| 7  | IPC                           | 720575940643539566 | 26 |     | Jefferis Lab: Imaan Tamimi (3), A. Javier (7), Laia Serratos (4), Rashmita Rana (1), Murthy and Seung Labs: Austin T Burke (13).                                                                                                                           |
| 8  | IPC                           | 720575940620628957 | 25 |     | Jefferis Lab: Imaan Tamimi (1), A. Javier (6), Murthy and Seung Labs: Austin T Burke (18)                                                                                                                                                                  |
| 9  | IPC                           | 720575940623081400 | 22 |     | Jefferis Lab: Markus Pleijzier (5), Murthy and Seung Labs: Austin T Burke (18).                                                                                                                                                                            |
| 10 | IPC                           | 720575940631884883 | 22 |     | Dacks Lab: Andrew Dacks (1), Jefferis Lab: Imaan Tamimi (1), Laia Serratos (8), Murthy and Seung Labs: Austin T Burke (7), Itisha Joshi (2).                                                                                                               |
| 11 | IPC                           | 720575940628363820 | 22 |     | Jefferis Lab: Imaan Tamimi (1), Dacks Lab: Andrew Dacks (1), Murthy and Seung Labs: Austin T Burke (6), Scott Lab: Meghan Laturney (1).                                                                                                                    |
| 12 | IPC                           | 720575940624064295 | 22 |     | Dacks Lab: Andrew Dacks (1), Jefferis Lab: Imaan Tamimi (3), Laia Serratos (10), Anjali Pandey (1), Murthy and Seung Labs: Austin T Burke (5).                                                                                                             |
| 13 | IPC                           | 720575940628199802 | 21 |     | Jefferis Lab: Markus Pleijzier (1), A. Javier (1), Laia Serratos (9), Philipp Schlegel (1), Murthy and Seung Labs: Austin T Burke (1), Wolf Lab: Fred Wolf (1).                                                                                            |
| 14 | IPC                           | 720575940623586284 | 17 |     | Jefferis Lab: Imaan Tamimi (1), Márcia Santos (4), Murthy and Seung Labs: Austin T Burke (66).                                                                                                                                                             |
| 15 | IPC                           | 720575940618694827 | 14 |     | Jefferis Lab: A. Javier (3), Imaan Tamimi (1), Laia Serratos (12), Anjali Pandey (1).                                                                                                                                                                      |
| 16 | IPC                           | 720575940614623455 | 10 |     | Murthy and Seung Labs: James Hebditch (4), Nash Hadjerol (1), Doug Bland (6), Joshua Bañez (6), Jefferis Lab: Philipp Schlegel (1).                                                                                                                        |
| 17 | IPC                           | 720575940611254681 | 7  |     | Jefferis Lab: Markus Pleijzier (2), A. Javier (3), Imaan Tamimi (9), Murthy and Seung Labs: Austin T Burke (13), Kim Lab: Minsik Yun (2).                                                                                                                  |
| 18 | IPC                           | 720575940615911380 | 6  | 442 | Jefferis Lab: A. Javier (6), Laia Serratos (6), Philipp Schlegel (1), Murthy and Seung Labs: Ryan Willie (1).                                                                                                                                              |
| 19 | Lgr3/FLAa3                    | 720575940626983185 | 36 |     | Jefferis Lab: Irene Salgarella (10), Murthy and Seung Labs: James Hebditch (5), Kyle Patrick Willie (4), Rey Adrian Candilada (1), Kendrick Joules Vinson (11), Zairene Lenizo (2), Nash Hadjerol (4).                                                     |
| 20 | Lgr3/FLAa3                    | 720575940620201084 | 32 |     | Jefferis Lab: Irene Salgarella (7), Laia Serratos (4), Murthy and Seung Labs: James Hebditch (4).                                                                                                                                                          |
| 21 | Lgr3/FLAa3                    | 720575940613895934 | 31 |     | Jefferis Lab: Irene Salgarella (10), Dharini Sapkal (2), Dhvani Patel (12), Murthy and Seung Labs: James Hebditch (2), Zairene Lenizo (2), Joshua Bañez (8).                                                                                               |
| 22 | Lgr3/FLAa3                    | 720575940629696763 | 30 |     | Jefferis Lab: Anjali Pandey (1), Murthy and Seung Labs: James Hebditch (4), Nash Hadjerol (6), Ben Silverman (1), Darrel Jay Akiatan (2).                                                                                                                  |
| 23 | Lgr3/FLAa3                    | 720575940644053271 | 19 |     | Jefferis Lab: Anjali Pandey (1), Christopher Dunne (11), Murthy and Seung Labs: Zairene Lenizo (1).                                                                                                                                                        |
| 24 | Lgr3/FLAa3                    | 720575940630329903 | 19 |     | Jefferis Lab: Irene Salgarella (15), Murthy and Seung Labs: James Hebditch (3).                                                                                                                                                                            |
| 25 | Lgr3/FLAa3                    | 720575940616987426 | 19 |     | Murthy and Seung Labs: James Hebditch (4), Jefferis Lab: Anjali Pandey (8), Christopher Dunne (4), Sangeeta Sisodiya (1), Dharini Sapkal (4).                                                                                                              |
| 26 | Lgr3/FLAa3                    | 720575940639420032 | 19 |     | Jefferis Lab: Irene Salgarella (16), Murthy and Seung Labs: James Hebditch (4), Zairene Lenizo (1).                                                                                                                                                        |
| 27 | Lgr3/FLAa3                    | 720575940614714299 | 18 |     | Jefferis Lab: Irene Salgarella (7), Murthy and Seung Labs: Nash Hadjerol (1).                                                                                                                                                                              |
| 28 | Lgr3/FLAa3                    | 720575940632879842 | 18 |     | Scott Lab: Zepeng Yao (17), Jefferis Lab: Arti Yadav (1), Bhargavi Parmar (6), Murthy and Seung Labs: J. Anthony Ocho (1), Austin T Burke (1), Zairene Lenizo (2).                                                                                         |
| 29 | Lgr3/FLAa3                    | 720575940626179658 | 15 |     | Jefferis Lab: Irene Salgarella (10).                                                                                                                                                                                                                       |
| 30 | Lgr3/FLAa3                    | 720575940626327070 | 15 | 271 | Murthy and Seung Labs: Austin T Burke (1), James Hebditch (4), Ariel Dagohoy (4), Nash Hadjerol (2), Janelia tracers: Tansy Yang (2), Jefferis Lab: Irene Salgarella (8), Laia Serratos (3), Scott Lab: Zepeng Yao (3), Pankratz Lab: Damian Demarest (2). |
| 31 | SMP & SLP:<br>SMP_L.SMP_L.276 | 720575940617650203 | 45 |     | Jefferis and Waddell Labs: Joseph Hsu (2), Murthy and Seung Labs: Kyle Patrick Willie (32), Jefferis Lab: Laia Serratos (1), Anjali Pandey (1), Yijie Yin (4).                                                                                             |

|    |                                   |                    |    |     |                                                                                                                                                                                                                                                                              |
|----|-----------------------------------|--------------------|----|-----|------------------------------------------------------------------------------------------------------------------------------------------------------------------------------------------------------------------------------------------------------------------------------|
| 32 | SMP & SLP:<br>SMP_R.SMP_R.27<br>8 | 720575940619352198 | 44 |     | Murthy Lab: Lucas Encarnacion-Rivera (1), Bock Lab: Davi Bock (4). Jefferis Lab: Yijie Yin (13), Greg Jefferis (15).                                                                                                                                                         |
| 33 | SMP & SLP:<br>SMPpv1; right       | 720575940631373869 | 38 |     | Jefferis and Waddell Labs: Joseph Hsu (2), Jefferis Lab: Irene Salgarella (1), Murthy and Seung Labs: J. Dolorosa (2), Kyle Patrick Willie (4).                                                                                                                              |
| 34 | SMP & SLP:<br>SMPpv1; left        | 720575940633754292 | 26 |     | Jefferis Lab: Yijie Yin (2). Murthy and Seung Labs: Ben Silverman (1).                                                                                                                                                                                                       |
| 35 | SMP & SLP:<br>SMP_R.SMP_R.80<br>8 | 720575940635354981 | 12 |     | Murthy and Seung Labs: Zairene Lenizo (1), Nash Hadjerol (24), remer tancontian (5). Jefferis Lab: Anjali Pandey (1).                                                                                                                                                        |
| 36 | SMP & SLP:<br>SMPpd1; left        | 720575940627327750 | 12 |     | Jefferis Lab: Rashmita Rana (1). Murthy and Seung Labs: James Hebditch (3), remer tancontian (1).                                                                                                                                                                            |
| 37 | SMP & SLP:<br>SMP_R.SMP_R.70      | 720575940611332722 | 11 |     | Jefferis Lab: Yijie Yin (1), Rashmita Rana (1). Murthy and Seung Labs: Kyle Patrick Willie (10).                                                                                                                                                                             |
| 38 | SMP & SLP:<br>SMPpd1; left        | 720575940619099558 | 10 |     | Jefferis Lab: A. Javier (2), Arti Yadav (1).                                                                                                                                                                                                                                 |
| 39 | SMP & SLP:<br>SMP_R.SMP_R.74<br>2 | 720575940631589407 | 9  |     | Murthy and Seung Labs: Austin T Burke (17), James Hebditch (2), Kendrick Joules Vinson (1). Jefferis Lab: Anjali Pandey (1).                                                                                                                                                 |
| 40 | SMP & SLP: SLPa1                  | 720575940618140283 | 8  |     | Jefferis Lab: A. Javier (3). Murthy and Seung Labs: Nash Hadjerol (1), Ariel Dagohoy (1), James Hebditch (2).                                                                                                                                                                |
| 41 | SMP & SLP:<br>SMPpd2              | 720575940619949556 | 7  |     | Jefferis Lab: Irene Salgarella (3), Anjali Pandey (1).                                                                                                                                                                                                                       |
| 42 | SMP & SLP:<br>SMP_R.SMP_R.75<br>7 | 720575940632526547 | 6  |     | Murthy and Seung Labs: Austin T Burke (1), Kyle Patrick Willie (6), Mendell Lopez (10), Doug Bland (24), remer tancontian (6). Jefferis Lab: Anjali Pandey (1).                                                                                                              |
| 43 | SMP & SLP:<br>SMP_L.SMP_L.706     | 720575940629298679 | 6  |     | Murthy Lab: Lucas Encarnacion-Rivera (3). Jefferis Lab: A. Javier (1), Varun Sane (8), Arti Yadav (1). Murthy and Seung Labs: Kendrick Joules Vinson (7), remer tancontian (2).                                                                                              |
| 44 | SMP & SLP:<br>SMP_R.SMP_R.90<br>6 | 720575940640456923 | 6  |     | Jefferis Lab: Philipp Schlegel (3), Yijie Yin (1), Varun Sane (6), Anjali Pandey (1). Selcho Lab: Mareike Selcho (17). Murthy and Seung Labs: Mendell Lopez (19), Kyle Patrick Willie (1).                                                                                   |
| 45 | SMP & SLP: DM3;<br>right          | 720575940621647498 | 5  |     | Jefferis Lab: A. Javier (1), Yijie Yin (1).                                                                                                                                                                                                                                  |
| 46 | SMP & SLP:<br>DM3_canonical       | 720575940619899668 | 5  |     | Jefferis Lab: Yijie Yin (16). Murthy and Seung Labs: Nash Hadjerol (1), Kyle Patrick Willie (1).                                                                                                                                                                             |
| 47 | SMP & SLP:<br>SMP_R.SMP_R.67<br>7 | 720575940629901307 | 5  |     | Jefferis Lab: Yijie Yin (2), Chitra Nair (1), Varun Sane (3). Murthy and Seung Labs: Zairene Lenizo (2).                                                                                                                                                                     |
| 48 | SMP & SLP:<br>SLP_L.LH_L.5        | 720575940616707545 | 5  |     | Jefferis and Wilson Labs: Laia Serratos Capdevila (1), Wes Murfin (4). Jefferis Lab: Yijie Yin (3), Varun Sane (1), Dhara Kakadiya (2), Chitra Nair (4). Murthy and Seung Labs: Doug Bland (3), Kendrick Joules Vinson (23), Joshua Bañez (10), Rey Adrian Candelada (1).    |
| 49 | SMP & SLP:<br>SLP_R.SLP_R.557     | 720575940629163419 | 5  |     | Murthy and Seung Labs: Austin T Burke (3). Jefferis Lab: Tomke S (14), Griffin Badalemente (4), Yijie Yin (1), Varun Sane (4), Dhvani Patel (1).                                                                                                                             |
| 50 | SMP & SLP:<br>SMP_L.SMP_L.578     | 720575940626063688 | 5  | 270 | Murthy and Seung Labs: Austin T Burke (13).                                                                                                                                                                                                                                  |
| 51 | CCHa2R (RA)                       | 720575940638190133 | 65 |     | Murthy and Seung Labs: Claire McKellar (1). Jefferis Lab: Anjali Pandey (1), Laia Serratos (117), Dhvani Patel (3). Scott Lab: Amanda Abusaif (1), Zepeng Yao (27). Kim Lab: hanetwo (1).                                                                                    |
| 52 | CCHa2R (RA)                       | 720575940615181910 | 64 |     | Jefferis Lab: Anjali Pandey (1). Scott Lab: Amanda Abusaif (12). Murthy and Seung Labs: Michelle Pantujan (41), Ryan Willie (459).                                                                                                                                           |
| 53 | CCHa2R (RA)                       | 720575940629642460 | 50 |     | Jefferis and Waddell Labs: Joseph Hsu (1). Murthy and Seung Labs: Claire McKellar (12), Ryan Willie (1), Shirleyjoy Serona (1), Doug Bland (296), J. Anthony Ocho (3). Jefferis Lab: Arti Yadav (1). Kim Lab: Hyungjun Choi (74).                                            |
| 54 | CCHa2R (RA)                       | 720575940611411162 | 49 | 228 | Murthy and Seung Labs: Claire McKellar (2), Nash Hadjerol (2), Zairene Lenizo (1). Jefferis Lab: Irene Salgarella (3). Scott Lab: Amanda Abusaif (11). Kim Lab: hanetwo (14), Chan Hyuk Kang (2).                                                                            |
| 55 | SMP & SEZ:<br>ADM09               | 720575940628462927 | 48 |     | Anderson Lab: Altyn Rymbek (2). Jefferis Lab: Imaan Tamimi (6), Laia Serratos (10), Rashmita Rana (1), Sangeeta Sisodiya (1). Murthy and Seung Labs: James Hebditch (1), Joshua Bañez (1), Mendell Lopez (58), Zairene Lenizo (2), J. Dolorosa (1). Kim Lab: Minsik Yun (1). |

|    |                                    |                    |    |     |                                                                                                                                                                                                                  |
|----|------------------------------------|--------------------|----|-----|------------------------------------------------------------------------------------------------------------------------------------------------------------------------------------------------------------------|
| 56 | SMP & SEZ: pCd1?                   | 720575940618057095 | 22 |     | Jefferis Lab: A. Javier (1), Irene Salgarella (1). Murthy and Seung Labs: Austin T Burke (23)                                                                                                                    |
| 57 | SMP & SEZ: pCd1?                   | 720575940604332460 | 12 |     | Seung Lab: Zhihao Zheng (1). Jefferis and Wilson Labs: Laia Serratosa Capdevila (1). Jefferis: A. Javier (1), Bhargavi Parmar (1). Murthy and Seung Labs: Austin T Burke (13).                                   |
| 58 | SMP & SEZ: ADM09p                  | 720575940642910152 | 12 |     | Scott Lab: Zepeng Yao (6). Murthy and Seung Labs: Austin T Burke (3), Shaina Mae Monungolh (1). Jefferis Lab: Yijie Yin (4), Marina Gkantia (10).                                                                |
| 59 | SMP & SEZ: DM3                     | 720575940626005330 | 11 |     | Janelia tracers: Tansy Yang (5). Jefferis Lab: Yijie Yin (3). Murthy and Seung Labs: Austin T Burke (7).                                                                                                         |
| 60 | SMP & SEZ: Dh44                    | 720575940618579505 | 10 |     | Jefferis Lab: Imaan Tamimi (1), A. Javier (4), Rashmita Rana (1). Murthy and Seung Labs: Austin T Burke (13), remer tancontian (7).                                                                              |
| 61 | SMP & SEZ: pCd1?                   | 720575940645882420 | 10 |     | Jefferis and Waddell Labs: Joseph Hsu (1). Murthy and Seung Labs: Austin T Burke (18), Joshua Bañez (1).                                                                                                         |
| 62 | SMP & SEZ: pCd1?                   | 720575940638671219 | 10 |     | Jefferis Lab: A. Javier (3), Irene Salgarella (2), Tomke S (2), Varun Sane (5). Murthy and Seung Labs: Claire McKellar (2), remer tancontian (5), Nash Hadjerol (7).                                             |
| 63 | SMP & SEZ: pCd1?                   | 720575940622119861 | 8  |     | Jefferis Lab: Irene Salgarella (2), Varun Sane (5), Yijie Yin (2). Murthy and Seung Labs: Austin T Burke (21).                                                                                                   |
| 64 | SMP & SEZ: DM2_dorsal              | 720575940629754588 | 8  |     | Anderson Lab: Altyn Rymbek (1). Jefferis Lab: Yijie Yin (11), Varun Sane (4). Murthy and Seung Labs: Austin T Burke (1), Joshua Bañez (1).                                                                       |
| 65 | SMP & SEZ: SMPpv2                  | 720575940621362044 | 7  |     | Jefferis and Wilson Labs: Laia Serratosa Capdevila (1). Jefferis Lab: Yijie Yin (34), Irene Salgarella (1), Imaan Tamimi (7), Chitra Nair (1). Murthy and Seung Labs: Shirleyjoy Serona (1), Austin T Burke (1). |
| 66 | SMP & SEZ: FLA_R.NO_OUT.6          | 720575940623184567 | 7  |     | Jefferis Lab: Katharina Eichler (1), Philipp Schlegel (1). Murthy and Seung Labs: Austin T Burke (1), Ben Silverman (2).                                                                                         |
| 67 | SMP & SEZ: pCd1?                   | 720575940638719907 | 7  |     | Jefferis and Waddell Labs: Joseph Hsu (1). Murthy and Seung Labs: Austin T Burke (1), Kyle Patrick Willie (6), Wes Murfin (29).                                                                                  |
| 68 | SMP & SEZ: pCd1?                   | 720575940612572054 | 6  |     | Seung Lab: Zhihao Zheng (1). Jefferis Lab: Irene Salgarella (6). Murthy and Seung Labs: Austin T Burke (37).                                                                                                     |
| 69 | SMP & SEZ: DM2                     | 720575940608174894 | 5  |     | Anderson Lab: Altyn Rymbek (1), Jefferis and Waddell Labs: Joseph Hsu (14).                                                                                                                                      |
| 70 | SMP & SEZ: DM2                     | 720575940635196334 | 5  |     | Jefferis Lab: Irene Salgarella (6). Janelia tracers: Tansy Yang (11). Murthy and Seung Labs: Austin T Burke (7).                                                                                                 |
| 71 | SMP & SEZ: pMP5/DM2                | 720575940628732610 | 5  |     | Murthy and Seung Labs: Austin T Burke (4), remer tancontian (5). Jefferis Lab: Irene Salgarella (3), Yijie Yin (22). Janelia tracers: Tansy Yang (2).                                                            |
| 72 | SMP & SEZ: SMP_R.FLA_L.29          | 720575940636113264 | 5  |     | Jefferis Lab: Greg Jefferis (1), Laia Serratosa (11), Anjali Pandey (1). Dickson Lab: Aisa Poh (1). Murthy and Seung Labs: Nash Hadjerol (11).                                                                   |
| 73 | SMP & SEZ: pCd1?                   | 720575940638285184 | 5  | 203 | Murthy and Seung Labs: Austin T Burke (3), Wes Murfin (9). Jefferis Lab: Laia Serratosa (4), Varun Sane (4).                                                                                                     |
| 74 | Antler L                           | 720575940622998967 | 54 |     | Murthy and Seung Labs: Austin T Burke (17), Zairene Lenizo (4), Darrel Jay Akiatan (1), Shirleyjoy Serona (12), Shaina Mae Monungolh (2). Jefferis Lab: Yijie Yin (3).                                           |
| 75 | Antler R                           | 720575940631226439 | 50 | 104 | Murthy and Seung Labs: Austin T Burke (17), Rey Adrian Candilada (3). Jefferis Lab: Varun Sane (7), Yijie Yin (5).                                                                                               |
| 76 | visual projection: SMP_R.SMP_R.201 | 720575940616608837 | 23 |     | Jefferis Lab: Irene Salgarella (1), Rashmita Rana (1), Griffin Badalemente (4). Murthy and Seung Labs: J. Anthony Ocho (12), J. Dolorosa (1).                                                                    |
| 77 | visual projection: SMP_R.SMP_R.698 | 720575940630512711 | 17 |     | Jefferis Lab: Arti Yadav (1). Murthy and Seung Labs: Doug Bland (19).                                                                                                                                            |
| 78 | visual projection: SMP_L.SMP_L.880 | 720575940636320063 | 15 |     | Murthy and Seung Labs: J. Dolorosa (26). Jefferis Lab: Rashmita Rana (1).                                                                                                                                        |
| 79 | visual projection: SMP_L.SMP_L.362 | 720575940620022960 | 12 | 67  | Kim Lab: Dustin Garner (2). Jefferis Lab: Yijie Yin (16). Murthy and Seung Labs: Ben Silverman (5), remer tancontian (1).                                                                                        |
| 80 | Fan shaped body: DL1_dorsal; left  | 720575940626612254 | 29 |     | Jefferis Lab: Rashmita Rana (1), Zeba Vohra (1). Murthy and Seung Labs: Austin T Burke (3), Kyle Patrick Willie (1).                                                                                             |
| 81 | Fan shaped body: FBI1-2            | 720575940642476448 | 17 |     | Murthy and Seung Labs: Jay Gager (1), James Hebditch (4), Kendrick Joules Vinson (1). Jefferis Lab: Varun Sane (6), Yijie Yin (3).                                                                               |

|    |                               |                    |    |      |                                                                                                                                                                                                                                                                               |
|----|-------------------------------|--------------------|----|------|-------------------------------------------------------------------------------------------------------------------------------------------------------------------------------------------------------------------------------------------------------------------------------|
| 82 | Fan shaped body:<br>FB.FB.473 | 720575940619615936 | 7  |      | Jefferis Lab: Imaan Tamimi (1), A. Javier (1), Laia Serratos (3), Arti Yadav (1), Sangeeta Sisodiya (7).                                                                                                                                                                      |
| 83 | Fan shaped body:<br>DL1       | 720575940613052200 | 5  | 58   | Jefferis Lab: Varun Sane (3), Griffin Badalemente (1). Murthy and Seung Labs: Shaina Mae Monungolh (1).                                                                                                                                                                       |
| 84 | Gallinule                     | 720575940617054621 | 21 |      | Jefferis Lab: Anjali Pandey (1). Murthy and Seung Labs: Mendell Lopez (1), Joshua Bañez (2).                                                                                                                                                                                  |
| 85 | Gallinule                     | 720575940630349905 | 18 |      | Seeds Hampel Lab: Lucia Kmecova (1). Huetteroth Lab: Wolf Huetteroth (3). Jefferis Lab: Laia Serratos (3).                                                                                                                                                                    |
| 86 | Gallinule                     | 720575940629913130 | 7  |      | Murthy and Seung Labs: Zairene Lenizo (12).                                                                                                                                                                                                                                   |
| 87 | Gallinule                     | 720575940620228449 | 5  |      | Jefferis Lab: Yijie Yin (1). Murthy and Seung Labs: remer tancontian (10), Zairene Lenizo (1). Itisha Joshi (4).                                                                                                                                                              |
| 88 | Gallinule                     | 720575940633711028 | 5  | 56   | Murthy and Seung Labs: Claire McKellar (6)                                                                                                                                                                                                                                    |
| 89 | SEZ:<br>PRW.PRW.213           | 720575940625172016 | 16 |      | Jefferis and Waddell Labs: Joseph Hsu (14). Murthy and Seung Labs: Darrel Jay Akiatan (31), Doug Bland (23), Austin T Burke (1), Ryan Willie (3), remer tancontian (1).                                                                                                       |
| 90 | SEZ: PRW.GNG.43               | 720575940630664556 | 8  |      | Jefferis Lab: Marta Costa (1), Sangeeta Sisodiya (2). Seeds Hampel Lab: Alexis E Santana Cruz (2). Murthy and Seung Labs: Zairene Lenizo (3), Darrel Jay Akiatan (5), Ariel Dagohoy (1), Rey Adrian Candilada (2), Joshua Bañez (1), Nash Hadjerol (6), remer tancontian (1). |
| 91 | SEZ:<br>PRW.PRW.312           | 720575940632055521 | 7  |      | Murthy and Seung Labs: J. Dolorosa (3), Shirleyjoy Serona (103). Jefferis Lab: Arti Yadav (1).                                                                                                                                                                                |
| 92 | SEZ: PRW.PRW.82               | 720575940616860758 | 6  |      | Jefferis Lab: Arti Yadav (1). Murthy and Seung Labs: Joshua Bañez (7), Zairene Lenizo (3), Doug Bland (12), J. Dolorosa (2), remer tancontian (1).                                                                                                                            |
| 93 | SEZ:<br>PRW.PRW.164           | 720575940622457579 | 6  | 43   | Jefferis Lab: Arti Yadav (1). Murthy and Seung Labs: Michelle Pantujan (2), Shirleyjoy Serona (3).                                                                                                                                                                            |
|    |                               |                    |    | 1742 |                                                                                                                                                                                                                                                                               |

928  
929  
930  
931  
932  
933  
934  
935  
936  
937  
938  
939

| Name | Flywire ID         | synapses from Bit2 (720575940621662332) | synapses from VESa1 (720575940632951597) | synapses from CCHa2R-RA (720575940621942021) | synapses from CCHa2R-RA (720575940627765903) | synapses from Cowboy (720575940611730674) | Total synapses | Tracing contributions (number of edits)                                                                                                                                                                                                                                                                                          |
|------|--------------------|-----------------------------------------|------------------------------------------|----------------------------------------------|----------------------------------------------|-------------------------------------------|----------------|----------------------------------------------------------------------------------------------------------------------------------------------------------------------------------------------------------------------------------------------------------------------------------------------------------------------------------|
| CCAP | 720575940646160948 | 18                                      | 8                                        | 9                                            | 5                                            | 0                                         | 40             | Jefferis Lab: Greg Jefferis (15), Zeba Vohra (17), A. Javier (14), Siqi Fang (9), Varun Sane (6), Dhara Kakadiya (4). Jefferis and Wilson: Laia Serratos Capdevila (1). Murthy and Seung Labs: Michelle Pantujan (1), Shaina Mae Monungolh (1), Rey Adrian Candilada (2), regine salem (1), Nash Hadjerol (1), Joshua Bañez (1). |



|                              |                            |    |    |    |    |   |    |                                                                                                                                                                                                                                                                                                                                                                |
|------------------------------|----------------------------|----|----|----|----|---|----|----------------------------------------------------------------------------------------------------------------------------------------------------------------------------------------------------------------------------------------------------------------------------------------------------------------------------------------------------------------|
|                              |                            |    |    |    |    |   |    | Murthy and Seung Labs: Austin T Burke (5), Rey Adrian Candilada (1), J. Anthony Ocho (8), Nash Hadjerol (26), Joshua Bañez (4), Ryan Willie (2).<br>Jefferis Lab: A. Javier (28), Imaan Tamimi (1), Katharina Eichler (11), Mendell Lopez (80).<br>Jefferis and Wilson Labs: Laia Serratosa Capdevila (2), Varun Sane (1).<br>Janelia tracers: Tansy Yang (1). |
| CCAP                         | 7205759<br>4062114<br>8993 | 19 | 14 | 5  | 7  | 5 | 50 |                                                                                                                                                                                                                                                                                                                                                                |
| Total synapses per cell type |                            | 37 | 22 | 14 | 12 | 5 | 90 |                                                                                                                                                                                                                                                                                                                                                                |

940

941

942

943

944

945

946

947

948

949

950

951

952

953

954

955

| <b>Table S4: Fly genotypes in figures</b> |                       |                                                                      |
|-------------------------------------------|-----------------------|----------------------------------------------------------------------|
| <b>Figure</b>                             | <b>Short Genotype</b> | <b>Full Genotype</b>                                                 |
| 1A                                        | nSyb                  | w1118 ; UAS-dcr2/+ ; UAS-nSynaptobrevin RNAi (attP2)/+               |
| 1A                                        | nSyb                  | w1118 ; UAS-dcr2/+; UAS-nSynaptobrevin (attP2)/VT011155-Gal4 (attP2) |
| 1A                                        | TRH                   | w1118 ; UAS-dcr2/+ ; UAS-Trh RNAi (attP2)/+                          |
| 1A                                        | TRH                   | w1118 ; UAS-dcr2/+ ; UAS-Trh RNAi (attP2)/VT011155-Gal4 (attP2)      |
| 1A                                        | ChAT                  | w1118 ; UAS-dcr2/+ ; UAS- ChAT RNAi (attP2)/+                        |



|    |        |                                                                    |
|----|--------|--------------------------------------------------------------------|
| 1A | ChAT   | w1118 ; UAS-dcr2/+ ; UAS- ChAT RNAi (attP2)/VT011155-Gal4 (attP2)  |
| 1A | TBH    | w1118 ; UAS-dcr2/+ ; UAS-Tbh RNAi (attP2)/+                        |
| 1A | TBH    | w1118 ; UAS-dcr2/+ ; UAS-Tbh RNAi (attP2)/VT011155-Gal4 (attP2)    |
| 1A | HDC    | w1118 ; UAS-dcr2/+ ; UAS-Hdc RNAi (attP2)/+                        |
| 1A | HDC    | w1118 ; UAS-dcr2/+ ; UAS-Hdc RNAi (attP2)/VT011155-Gal4 (attP2)    |
| 1A | VMAT   | w1118 ; UAS-dcr2/+ ; UAS-VMAT RNAi (attP2)/+                       |
| 1A | VMAT   | w1118 ; UAS-dcr2/+ ; UAS-VMAT RNAi (attP2)/VT011155-Gal4 (attP2)   |
| 1A | GAD1   | w1118 ; UAS-dcr2/+ ; UAS-GAD1 RNAi (attP2)/+                       |
| 1A | GAD1   | w1118 ; UAS-dcr2/+ ; UAS-GAD1 RNAi (attP2)/VT011155-Gal4 (attP2)   |
| 1A | DDC    | w1118 ; UAS-dcr2/+ ; UAS-DDC RNAi (attP2)/+                        |
| 1A | DDC    | w1118 ; UAS-dcr2/+ ; UAS-DDC RNAi (attP2)/VT011155-Gal4 (attP2)    |
| 1A | DVGlut | w1118 ; UAS-dcr2/+ ; UAS-DVGlut RNAi (attP2)/+                     |
| 1A | DVGlut | w1118 ; UAS-dcr2/+ ; UAS-DVGlut RNAi (attP2)/VT011155-Gal4 (attP2) |
| 1A | sNPF   | w1118 ; UAS-dcr2/+ ; UAS-sNPF RNAi (attP2)/+                       |
| 1A | sNPF   | w1118 ; UAS-dcr2/+ ; UAS-sNPF RNAi (attP2)/VT011155-Gal4 (attP2)   |
| 1A | VGAT   | w1118 ; UAS-dcr2/+ ; UAS-VGAT RNAi (attP2)/+                       |
| 1A | VGAT   | w1118 ; UAS-dcr2/+ ; UAS-VGAT RNAi (attP2)/VT011155-Gal4 (attP2)   |
| 1A | TDC2   | w1118 ; UAS-dcr2/+ ; UAS-Tdc2 RNAi (attP2)/+                       |
| 1A | TDC2   | w1118 ; UAS-dcr2/+ ; UAS-Tdc2 RNAi (attP2)/VT011155-Gal4 (attP2)   |
| 1A | dILP1  | w1118 ; UAS-dcr2/+ ; UAS-dILP1 RNAi (attP2)/+                      |
| 1A | dILP1  | w1118 ; UAS-dcr2/+ ; UAS-dILP1 RNAi (attP2)/VT011155-Gal4 (attP2)  |
| 1A | dILP2  | w1118 ; UAS-dcr2/+ ; UAS-dILP2 RNAi (attP2)/+                      |
| 1A | dILP2  | w1118 ; UAS-dcr2/+ ; UAS-dILP2 RNAi (attP2)/VT011155-Gal4 (attP2)  |
| 1A | dILP3  | w1118 ; UAS-dcr2/+ ; UAS-dILP3 RNAi (attP2)/+                      |
| 1A | dILP3  | w1118 ; UAS-dcr2/+ ; UAS-dILP3 RNAi (attP2)/VT011155-Gal4 (attP2)  |
| 1A | dILP4  | w1118 ; UAS-dcr2/+ ; UAS-dILP4 RNAi (attP2)/+                      |
| 1A | dILP4  | w1118 ; UAS-dcr2/+ ; UAS-dILP4 RNAi (attP2)/VT011155-Gal4 (attP2)  |
| 1A | dILP5  | w1118 ; UAS-dcr2/+ ; UAS-dILP5 RNAi (attP2)/+                      |
| 1A | dILP5  | w1118 ; UAS-dcr2/+ ; UAS-dILP5 RNAi (attP2)/VT011155-Gal4 (attP2)  |
| 1A | dILP6  | w1118 ; UAS-dcr2/+ ; UAS-dILP6 RNAi (attP2)/+                      |
| 1A | dILP6  | w1118 ; UAS-dcr2/+ ; UAS-dILP6 RNAi (attP2)/VT011155-Gal4 (attP2)  |
| 1A | dILP7  | w1118 ; UAS-dcr2/+ ; UAS-dILP7 RNAi (attP2)/+                      |

|            |                                     |                                                                                                                                                       |
|------------|-------------------------------------|-------------------------------------------------------------------------------------------------------------------------------------------------------|
| 1A         | dILP7                               | w1118 ; UAS-dcr2/+ ; UAS-dILP7 RNAi (attP2)/VT011155-Gal4 (attP2)                                                                                     |
| 1B         | dILP3 RNAi                          | w1118 ; + ; UAS-dILP3 RNAi (attP2)/+                                                                                                                  |
| 1B         | dILP3 RNAi                          | w1118 ; + ; UAS-dILP3 RNAi (attP2)/VT011155-Gal4 (attP2)                                                                                              |
| 1B         | Amon RNAi                           | w1118/w* ; + ; UAS-amon RNAi (attP2)/+                                                                                                                |
| 1B         | Amon RNAi                           | w1118/w* ; + ; UAS-amon RNAi (attP2)/VT011155-Gal4 (attP2)                                                                                            |
| 1B         | ISN-Gal4                            | w1118 ; + ; VT011155-Gal4 (attP2)/+                                                                                                                   |
| 1D         | ISN-Gal4 > tdT                      | w1118/w* ; UAS-myrGFP.QUAS-mtdTomato-3xHA/+; trans-Tango/VT011155-Gal4 (attP2)                                                                        |
| 2B,2F      | BiT split-Gal4 > Chrimson           | w1118, UAS-IVS-CsChrimson.mVenus (attP18)/+; VT002073-Gal4.AD (attP40)/+; VT040568-Gal4.DBD (attP2)/+                                                 |
| 2D, 2E     | ISN > Chrimson, BiT > ArcLight      | 13XLexAop2-IVS-p10-ChrimsonR-mCherry (attP18)/w1118; GMR34G02-LexA (attP40)/VT002073-Gal4.AD (attP40); VT040568-Gal4.DBD (attP2)/UAS-ArcLight (attP2) |
| 2F, 2G     | BiT split-Gal4                      | w1118; VT002073-Gal4.AD (attP40)/+; VT040568-Gal4.DBD (attP2)/+                                                                                       |
| 2F         | Empty split-Gal4 > Chrimson         | w1118, UAS-IVS-CsChrimson.mVenus (attP18); p65-AD.empty (attP40)/+; GAL4-DBD.empty (attP2)/+                                                          |
| 2F         | Gr5a-Gal4 > Chrimson                | w1118, UAS-IVS-CsChrimson.mVenus (attP18); Gr5a-Gal4/+; Gr5a-Gal4/+                                                                                   |
| 2F         | ppk28-Gal4 > Chrimson               | w1118, UAS-IVS-CsChrimson.mVenus (attP18); + ; ppk28-Gal4/+                                                                                           |
| 2G         | BiT split-Gal4 > nSyb RNAi          | w1118; VT002073-Gal4.AD (attP40)/+; VT040568-Gal4.DBD (attP2)/UAS-nSynaptobrevin RNAi (attP2)                                                         |
| 2G, 4G, 5G | nSyb RNAi                           | w1118; + ; UAS-nSynaptobrevin RNAi (attP2)/+                                                                                                          |
| 4B, 4F     | CCHa2R (RA) > Chrimson              | w1118, UAS-IVS-CsChrimson.mVenus (attP18)/w1118; TI{2A-GAL4}CCHa2-R[2A-A.GAL4]/+; +                                                                   |
| 4D, 4E     | ISN > Chrimson, CCHa2R (RA) > GCaMP | w1118; GMR34G02-LexA (attP40)/ TI{2A-GAL4}CCHa2-R[2A-A.GAL4]; LexAop-Chrimson,UAS-GCaMP6s/TM2                                                         |
| 4F, 4G     | CCHa2R (RA)                         | w1118; TI{2A-GAL4}CCHa2-R[2A-A.GAL4]/+; +                                                                                                             |
| 4F, 5F     | UAS-Chrimson                        | w1118, UAS-IVS-CsChrimson.mVenus (attP18)/w1118; +; +                                                                                                 |
| 4G         | CCHa2R (RA) > nSyb RNAi             | w1118; TI{2A-GAL4}CCHa2-R[2A-A.GAL4]/+; UAS-nSynaptobrevin RNAi (attP2)/+                                                                             |
| 5B, 5F     | CCAP > Chrimson                     | w1118, UAS-IVS-CsChrimson.mVenus (attP18)/w1118; CCAP-Gal4/+; +                                                                                       |
| 5D, 5E     | ISN > Chrimson, CCAP > GCaMP        | w1118, 13XLexAop2-IVS-p10-ChrimsonR-mCherry (attP18)/w1118; GMR34G02-LexA (attP40)/CCAP-Gal4; 20XUAS-IVS-jGCaMP7b(VK00005)/+                          |
| 5F, 5G     | CCAP                                | w1118; CCAP-Gal4/+; +                                                                                                                                 |
| 5G         | CCAP > NSyb RNAi                    | w1118; CCAP-Gal4/+; UAS-nSynaptobrevin RNAi (attP2)/+                                                                                                 |
| Supp 1A    | ISN > transTango                    | w*/w1118 ; UAS-myrGFP.QUAS-mtdTomato-3xHA/+; trans-Tango/VT011155-Gal4 (attP2)                                                                        |

|           |                                     |                                                                                                                                                                                |
|-----------|-------------------------------------|--------------------------------------------------------------------------------------------------------------------------------------------------------------------------------|
| Supp 2A,B | BiT genetic control                 | w1118, 13XLexAop2-IVS-p10-ChrimsonR-mCherry (attP18)/w1118; VT002073-Gal4.AD (attP40)/+; VT040568-Gal4.DBD (attP2)/UAS-ArcLight (attP2)                                        |
| Supp 3A,B | BiT > Chrimson, IPC > GCaMP         | 10XUAS-syn21-Chrimson88-tdT3.1 (attP18), LexAop2-syn21-opGCaMP6s suHw (attP8)/w1118; TI{2A-lexA::GAD}CCHa2-R[2A-A.lexA]/VT002073-Gal4.AD (attP40); VT040568-Gal4.DBD (attP2)/+ |
| Supp 3C,D | IPC genetic control                 | 10XUAS-syn21-Chrimson88-tdT3.1 (attP18), LexAop2-syn21-opGCaMP6s suHw (attP8)/w1118; dILP2-LexA/CyO; TM2/TM3, Sb                                                               |
| Supp 4A,B | CCHa2R (RA) genetic control         | w1118; TI{2A-GAL4}CCHa2-R[2A-A.GAL4]/CyO; LexAop-Chrimson,UAS-GCaMP6s/TM2                                                                                                      |
| Supp 4C,D | BiT > Chrimson, CCHa2R (RA) > GCaMP | 10XUAS-syn21-Chrimson88-tdT3.1 (attP18), LexAop2-syn21-opGCaMP6s suHw (attP8)/w1118; TI{2A-lexA::GAD}CCHa2-R[2A-A.lexA]/VT002073-Gal4.AD (attP40); VT040568-Gal4.DBD (attP2)/+ |
| Supp 5    | ISN > Chrimson, CCAP > GCaMP        | 13XLexAop2-IVS-p10-ChrimsonR-mCherry (attP18)/w1118; GMR34G02-LexA (attP40)/+ ; 20XUAS-IVS-jGCaMP7b(VK00005)/CCAP-Gal4                                                         |

956

A

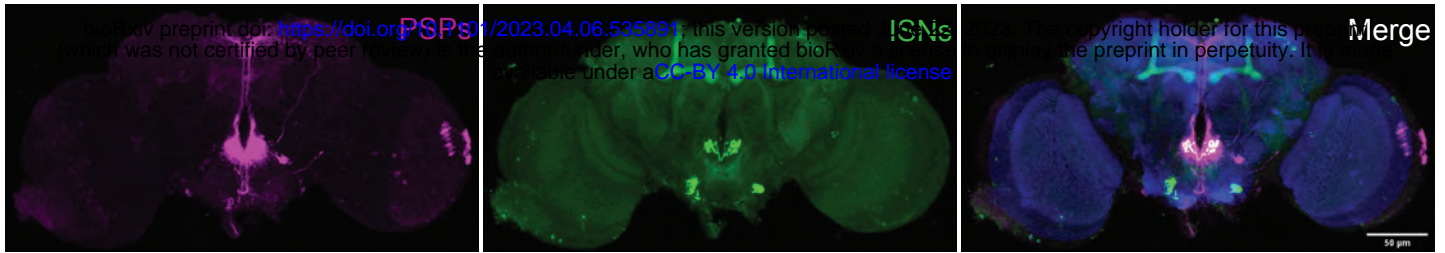

B

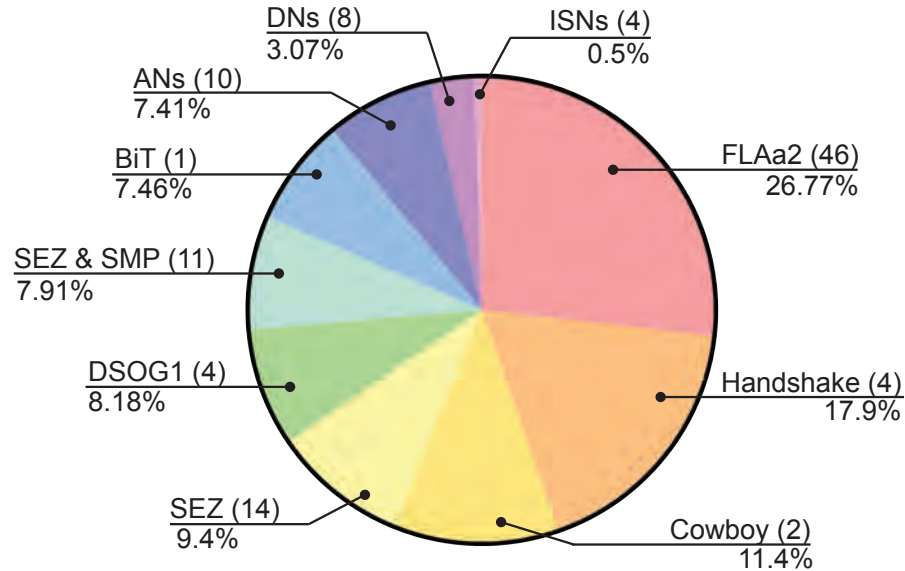

C

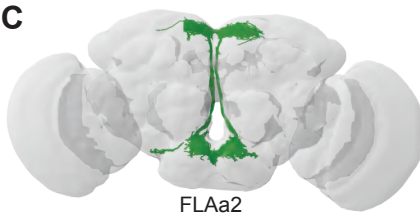

D

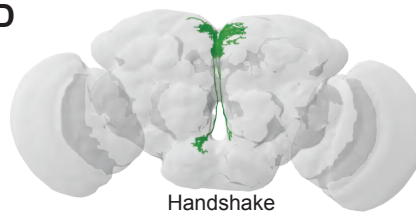

E

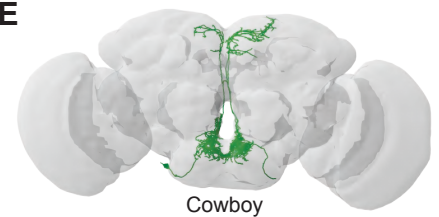

F

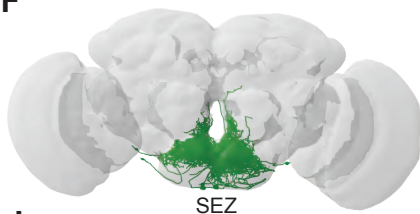

G

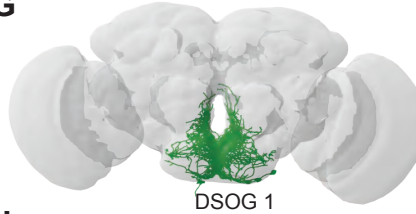

H

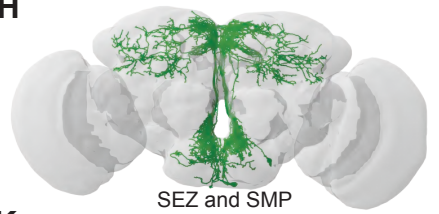

I

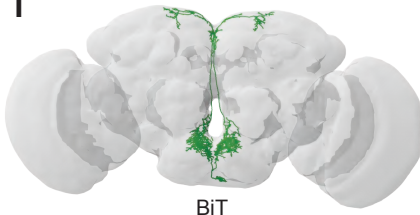

J

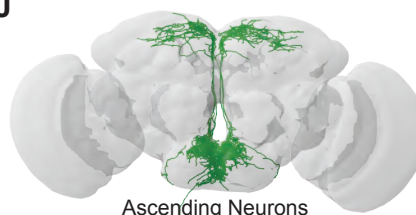

K

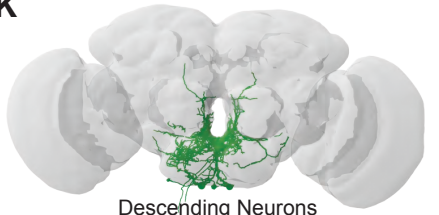

### Figure 1 - supplement 1. ISN postsynaptic partners labeled by trans-Tango and EM

(A) Expression of trans-Tango ligand in the ISNs (green) and postsynaptic partners (PSPs) (magenta). nc82 staining in blue. (B) Distribution of synaptic output from the ISNs divided by cell class or brain region. Total of 4050 synapses from the ISNs and 104 postsynaptic partners. FLAa2 (46 neurons) receive 26.77% of all ISN output, Handshake (4 neurons) 17.9%, Cowboy (2 neurons) 11.4%, neurons located in the subesophageal zone (SEZ) (14 neurons) 9.04%, DSOG1 (4 neurons) 8.18%, neurons with neurites in the subesophageal zone and superior medial protocerebrum (SEZ & SMP) (11 neurons) 7.91%, BiT (1 neuron) 7.46%, Ascending neurons (ANs) (10 neurons) 4.41%, Descending neurons (DNs) (8 neurons) 3.07%, and ISNs (4 neurons) 0.5%. Only postsynaptic partners with 5 or more synapses were considered for this analysis. Reconstruction of FLAa2 neurons (C), Handshake neurons (D), Cowboy neurons (E), neurons innervating the SEZ (F), DSOG1 neurons (G), neurons innervating the SEZ & SMP (H), BiT (I), ascending neurons (J), descending neurons (K).

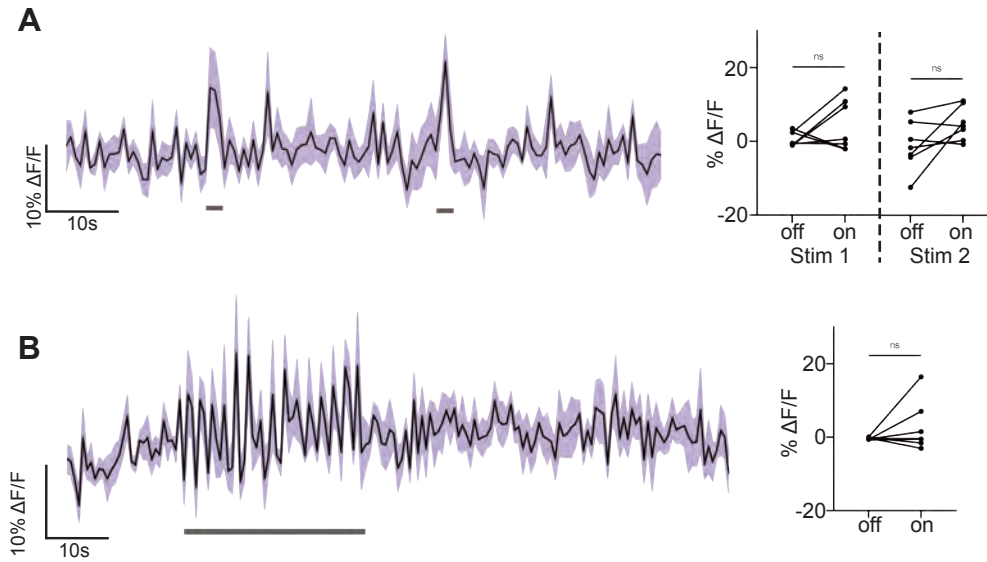

### Figure 2 - supplement 2. BiT genetic control functional imaging

Genetic controls: we expressed the light sensitive ion channel Chrimson without the ISN-LexA driver and exposed the brains to 660nm LED. We expressed the voltage sensor ArcLight in BiT and imaged it with a 2 photon microscope. (A) ArcLight response of BiT soma to 2s LED exposure or (B) 30s LED exposure. Left: Scatter plot shows mean  $\pm$  SEM of all flies imaged, gray bars represent LED stimulation. Right: Quantification of mean fluorescence intensity before stim (off) and during stim (on), each dot represents one fly. Paired Wilcoxon or paired t-test.  $n=7$  flies.

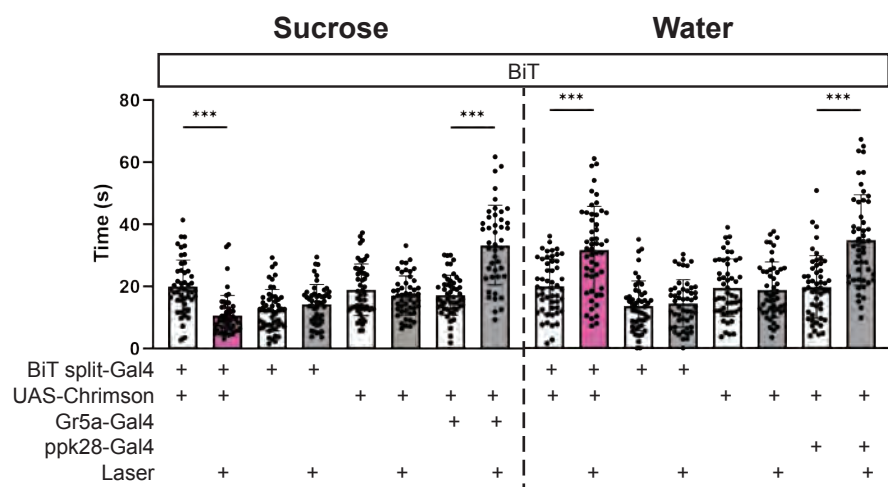

**Figure 2 - supplement 2. BiT optogenetic activation ingestion phenotype**

Temporal consumption assay for 1M sucrose or water during acute optogenetic activation of BiT with Chrimson. Represented are the mean, and the 10-90 percentile. Data was analyzed using Kruskal-Wallis test, followed by multiple comparisons against the no laser control. n=44-54 animals/genotype. \*\*\*p<0.001



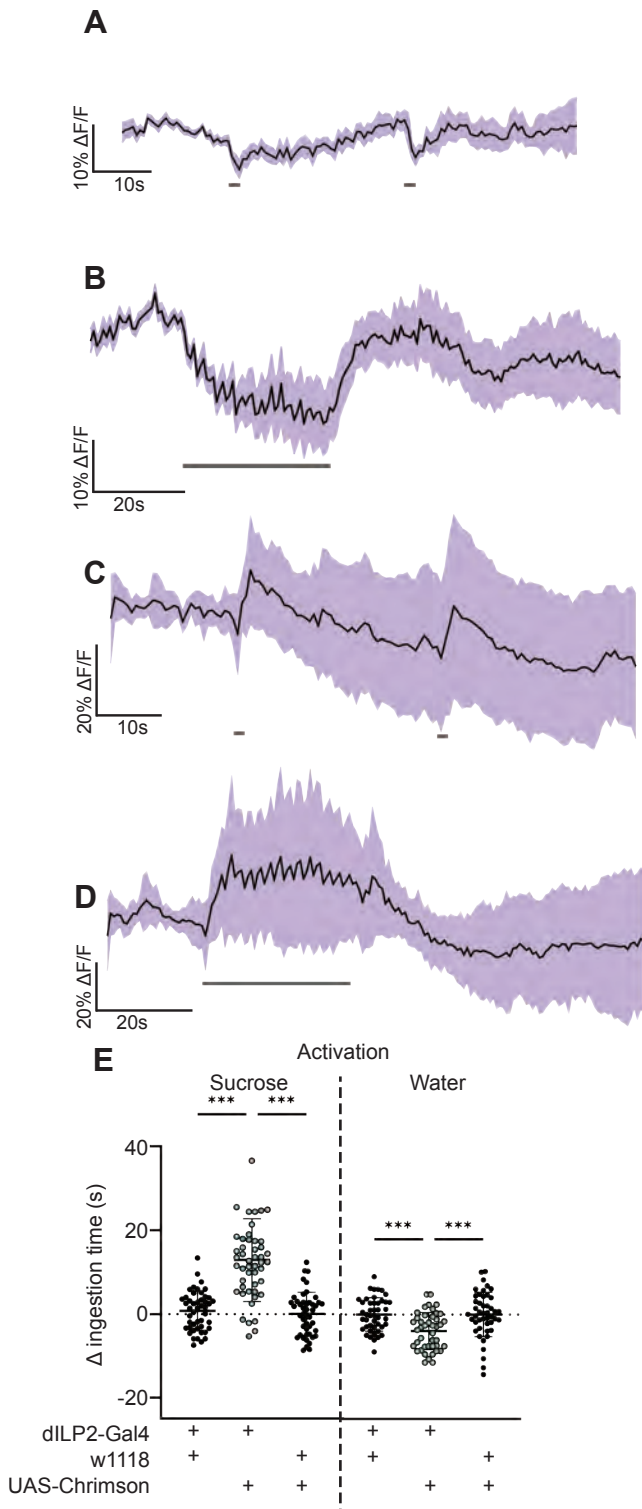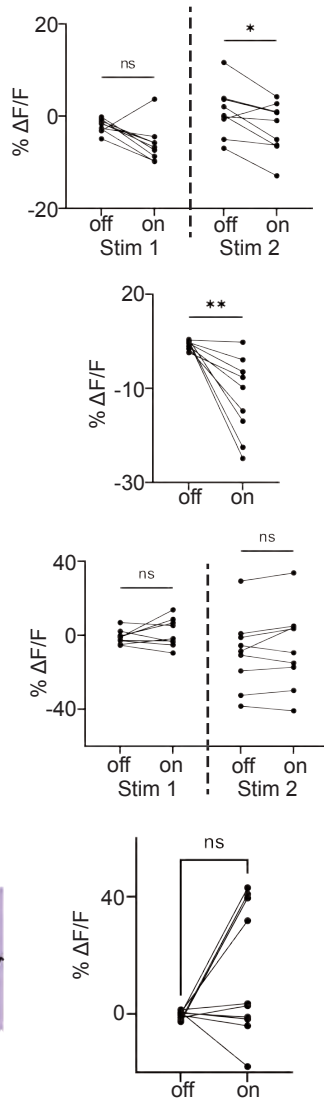

### Figure 3 - supplement 1. IPC response to BiT stimulation

A and B: We expressed the light sensitive ion channel Chrimson in BiT and optogenetically stimulated it with 660nm LED. We expressed the calcium sensor GCaMP in the IPCs and imaged them with a 2 photon microscope. (A) Calcium response of IPC somas to 2s optogenetic activation of BIT or (B) 30s optogenetic activation of BIT. Left: Scatter plot shows mean +/- SEM of all flies imaged, gray bars represent LED stimulation. Right: Quantification of mean fluorescence intensity before stim (off) and during stim (on), each dot represents one fly. Paired Wilcoxon test or paired t-test. n=9 flies. C and D: Genetic controls: we expressed the light sensitive ion channel Chrimson without the BiT-split Gal4 driver and exposed the brains to 660nm LED. We expressed the calcium sensor GCaMP in the IPCs and imaged them with a 2 photon microscope. (C) Calcium response of IPC somas to 2s LED exposure or (D) 30s LED exposure. Left: Scatter plot shows mean +/- SEM of all flies imaged, gray bars represent LED stimulation. Right: Quantification of mean fluorescence intensity before stim (off) and during stim (on), each dot represents one fly. Paired t-test. n=9-10 flies. (E) Temporal consumption assay for 1M sucrose or water during acute optogenetic activation of IPCs with Chrimson. Ingestion time of females exposed to light normalized to dark controls of indicated genotype. One-way ANOVA with Holm-Šidák multiple comparison test. n=43-49 animals/genotype. \*p<0.05, \*\*p<0.01, \*\*\*p<0.001





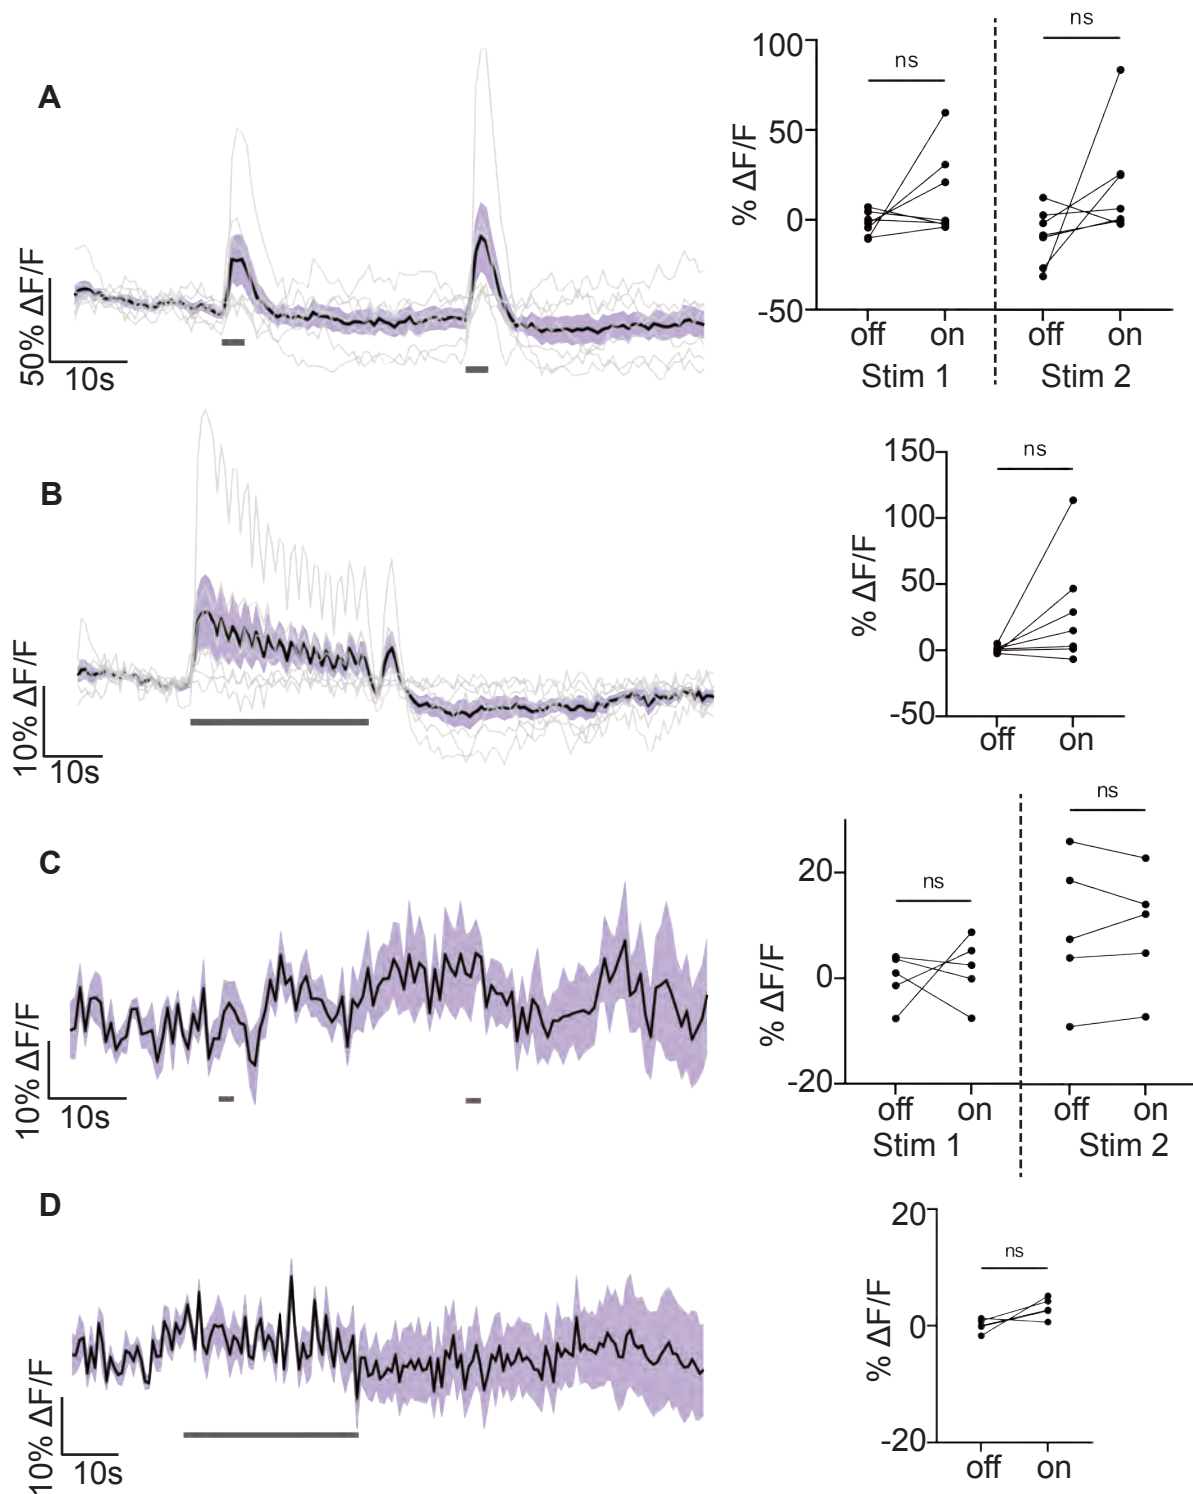

**Figure 4 - supplement 1. CCHA2R-RA genetic controls functional imaging and response to BiT optogenetic stimulation**

A and B: Genetic controls: we expressed the light sensitive ion channel Chrimson without the ISN-LexA driver and exposed the brains to 660nm LED. We expressed the calcium sensor GCaMP in the CCHA2R-RA neurons and imaged them with a 2 photon microscope. (A) Calcium response of CCHA2R-RA SEZ neurites to 2s LED exposure or (B) 30s LED exposure. Left: Scatter plot shows mean  $\pm$  SEM of all flies imaged, with individual traces in gray, gray bars represent LED stimulation. Right: Quantification of mean fluorescence intensity before stim (off) and during stim (on), each dot represents one fly. Paired Wilcoxon test and paired t-test. n=7 flies. C and D: We expressed the light sensitive ion channel Chrimson in BiT and optogenetically stimulated it with 660nm LED. We expressed the calcium sensor GCaMP in the CCHA2R-RA neurons and imaged them with a 2 photon microscope. (C) Calcium response of CCHA2R-RA somas to 2s optogenetic stimulation of BiT or (D) 30s optogenetic stimulation of BiT. Left: Scatter plot shows mean  $\pm$  SEM of all flies imaged, gray bars represent LED stimulation. Right: Quantification of mean fluorescence intensity before stim (off) and during stim (on), each dot represents one fly. Paired t-test. n=5 flies.

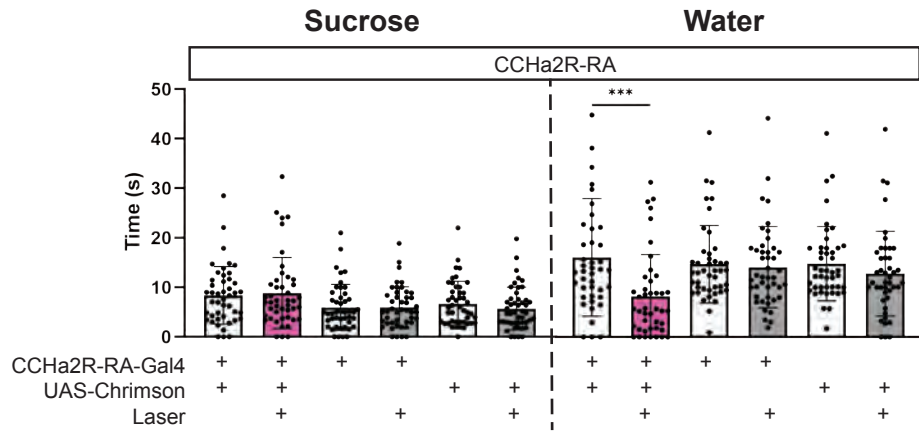

**Figure 4 - supplement 2.**  
**CCHA2R-RA optogenetic activation ingestion phenotype**  
Temporal consumption assay for 1M sucrose or water during acute optogenetic activation of CCHA2R-RA neurons with Chrimson. Represented are the mean, and the 10-90 percentile. Data was analyzed using Kruskal-Wallis test, followed by multiple comparisons against the no laser control. n=42-47 animals/genotype. \*\*\*p<0.001

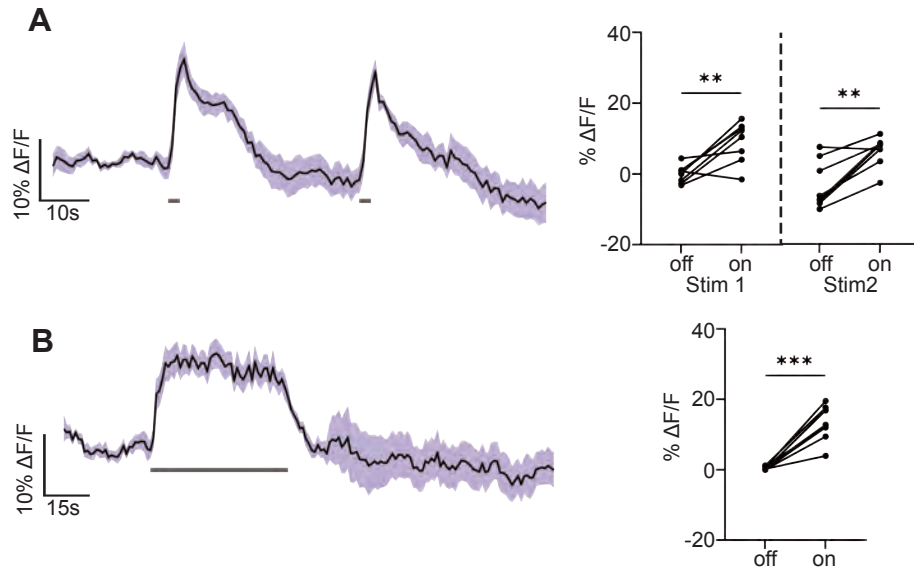

**Figure 5 - supplement 1. CCAP response to ISN activation using another CCAP-Gal4 driver**

We expressed the light sensitive ion channel Chrimson in the ISNs and optogenetically stimulated them with 660nm LED. We expressed the calcium sensor GCaMP in the CCAP neurons and imaged them with a 2 photon microscope. (A) Calcium response of CCAP neurites to 2s optogenetic stimulation of the ISNs or (B) 30s optogenetic stimulation of the ISNs. Left: Scatter plot shows mean  $\pm$  SEM of all flies imaged, gray bars represent LED stimulation. Right: Quantification of mean fluorescence intensity before stim (off) and during stim (on), each dot represents one fly. Paired t-test. n=8 flies. \*\*p<0.01, \*\*\*p<0.001

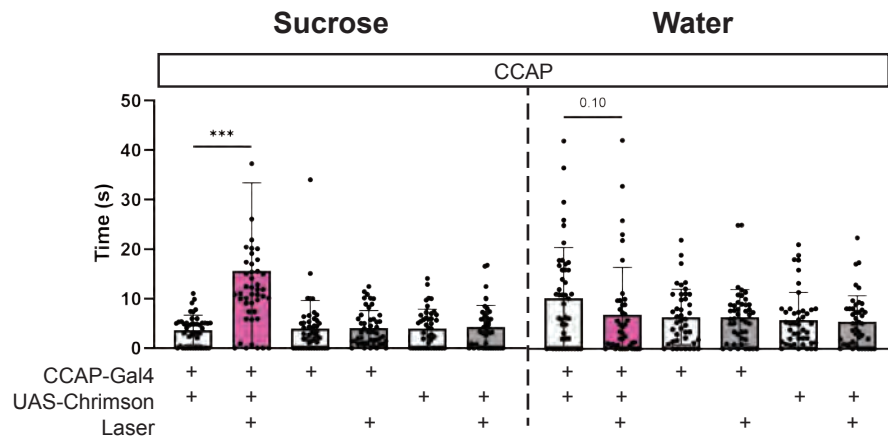

**Figure 5 - supplement 2.  
CCAP optogenetic activation ingestion phenotype**

Temporal consumption assay for 1M sucrose or water during acute optogenetic activation of CCAP neurons with Chrimson. Represented are the mean, and the 10-90 percentile. Data was analyzed using Kruskal-Wallis test, followed by multiple comparisons against the no laser control. n=42-48 animals/genotype. \*\*\*p<0.001
